# Supplementary material
Source: HighWire-hosted journal article supplement (doi:10.1101/rna.027615.111)
Supplement: Supp_Table_S1.xlsx [file Supp_Table_S1.xlsx]

## Sheet: Foglio1
> 0.001% counts										0.0001% - 0.001% counts
Annotated	Raw Counts				Percentage					Annotated	Raw Counts				Percentage
miRNA	Normoxic HUVEC_1	Hypoxic HUVEC_1	Normoxic HUVEC_2	Hypoxic HUVEC_2	Normoxic HUVEC_1	Hypoxic HUVEC_1	Normoxic HUVEC_2	Hypoxic HUVEC_2		miRNA	Normoxic HUVEC_1	Hypoxic HUVEC_1	Normoxic HUVEC_2	Hypoxic HUVEC_2	Normoxic HUVEC_1	Hypoxic HUVEC_1	Normoxic HUVEC_2	Hypoxic HUVEC_2
hsa-let-7a-5p	3846	4448	28873	43533	0.53506	0.67123	2.01092	2.18212		hsa-let-7g-3p	3	2	19	17	0.00042	0.0003	0.00132	0.00085
hsa-let-7a-3p	203	148	224	328	0.02824	0.02233	0.0156	0.01644		hsa-miR-101-5p	4	18	38	118	0.00056	0.00272	0.00265	0.00591
hsa-let-7b-5p	1825	2329	24271	41923	0.2539	0.35146	1.6904	2.10142		hsa-miR-10a-3p	5	7	15	27	0.0007	0.00106	0.00104	0.00135
hsa-let-7b-3p	178	134	244	295	0.02476	0.02022	0.01699	0.01479		hsa-miR-1179	1	1	6	14	0.00014	0.00015	0.00042	0.0007
hsa-let-7c	1386	1517	13934	22131	0.19282	0.22893	0.97046	1.10933		hsa-miR-122-5p	1	2	2	2	0.00014	0.0003	0.00014	0.0001
hsa-let-7d-5p	1236	1026	6072	6758	0.17195	0.15483	0.4229	0.33875		hsa-miR-1226-3p	2	4	7	8	0.00028	0.0006	0.00049	0.0004
hsa-let-7d-3p	97	66	340	392	0.01349	0.00996	0.02368	0.01965		hsa-miR-1229	7	7	13	24	0.00097	0.00106	0.00091	0.0012
hsa-let-7e-5p	1660	1700	6841	11203	0.23094	0.25654	0.47645	0.56156		hsa-miR-1248	1	1	5	4	0.00014	0.00015	0.00035	0.0002
hsa-let-7f-5p	3511	3555	15789	22941	0.48845	0.53647	1.09965	1.14993		hsa-miR-1249	2	6	30	20	0.00028	0.00091	0.00209	0.001
hsa-let-7f-1-3p	163	112	152	175	0.02268	0.0169	0.01059	0.00877		hsa-miR-1256	7	3	3	7	0.00097	0.00045	0.00021	0.00035
hsa-let-7f-2-3p	22	25	68	94	0.00306	0.00377	0.00474	0.00471		hsa-miR-1262	1	1	7	11	0.00014	0.00015	0.00049	0.00055
hsa-let-7g-5p	6524	6460	24632	36417	0.90763	0.97486	1.71554	1.82543		hsa-miR-1268a	3	4	16	12	0.00042	0.0006	0.00111	0.0006
hsa-let-7i-5p	5923	5321	18780	24428	0.82401	0.80297	1.30797	1.22447		hsa-miR-1270	1	9	9	22	0.00014	0.00136	0.00063	0.0011
hsa-let-7i-3p	26	25	130	101	0.00362	0.00377	0.00905	0.00506		hsa-miR-1271-5p	4	1	7	9	0.00056	0.00015	0.00049	0.00045
hsa-miR-100-5p	12674	9259	19084	23969	1.76322	1.39724	1.32914	1.20146		hsa-miR-1287	6	7	13	30	0.00083	0.00106	0.00091	0.0015
hsa-miR-100-3p	15	15	20	6	0.00209	0.00226	0.00139	0.0003		hsa-miR-129-2-3p	6	1	2	5	0.00083	0.00015	0.00014	0.00025
hsa-miR-101-3p	91	60	165	174	0.01266	0.00905	0.01149	0.00872		hsa-miR-1303	2	11	18	10	0.00028	0.00166	0.00125	0.0005
hsa-miR-103a-2-5p	31	18	48	45	0.00431	0.00272	0.00334	0.00226		hsa-mir-1306	2	11	16	24	0.00028	0.00166	0.00111	0.0012
hsa-miR-106a-5p	348	368	1010	1219	0.04841	0.05553	0.07034	0.0611		hsa-miR-143-3p	4	2	8	15	0.00056	0.0003	0.00056	0.00075
hsa-miR-106b-5p	896	809	4038	3395	0.12465	0.12208	0.28123	0.17018		hsa-miR-147b	1	1	6	1	0.00014	0.00015	0.00042	5e-05
hsa-miR-106b-3p	151	128	282	566	0.02101	0.01932	0.01964	0.02837		hsa-miR-1537	3	2	3	10	0.00042	0.0003	0.00021	0.0005
hsa-miR-107	355	270	454	601	0.04939	0.04074	0.03162	0.03013		hsa-miR-155-3p	5	3	1	1	0.0007	0.00045	7e-05	5e-05
hsa-miR-10a-5p	1515	1468	3742	7234	0.21077	0.22153	0.26062	0.36261		hsa-miR-15b-3p	3	3	13	7	0.00042	0.00045	0.00091	0.00035
hsa-miR-10b-5p	1681	1814	5944	12432	0.23386	0.27374	0.41398	0.62316		hsa-miR-187-3p	6	12	17	37	0.00083	0.00181	0.00118	0.00185
hsa-miR-10b-3p	11	17	86	117	0.00153	0.00257	0.00599	0.00586		hsa-mir-190a	1	1	6	7	0.00014	0.00015	0.00042	0.00035
hsa-miR-1180	220	147	560	846	0.03061	0.02218	0.039	0.04241		hsa-miR-1913	2	2	7	6	0.00028	0.0003	0.00049	0.0003
hsa-miR-1185-5p	8	16	65	80	0.00111	0.00241	0.00453	0.00401		hsa-miR-192-3p	1	1	6	11	0.00014	0.00015	0.00042	0.00055
hsa-miR-1197	22	22	37	30	0.00306	0.00332	0.00258	0.0015		hsa-miR-193b-5p	7	1	19	33	0.00097	0.00015	0.00132	0.00165
hsa-miR-1254	13	9	25	37	0.00181	0.00136	0.00174	0.00185		hsa-miR-196a-5p	1	5	73	162	0.00014	0.00075	0.00508	0.00812
hsa-miR-125a-3p	38	33	105	157	0.00529	0.00498	0.00731	0.00787		hsa-miR-196b-3p	3	3	28	23	0.00042	0.00045	0.00195	0.00115
hsa-miR-125a-5p	5407	4658	16751	35480	0.75223	0.70292	1.16666	1.77846		hsa-miR-200a-3p	3	3	20	20	0.00042	0.00045	0.00139	0.001
hsa-miR-125b-5p	13466	10743	27297	44680	1.87341	1.62119	1.90115	2.23962		hsa-miR-200b-3p	4	2	6	22	0.00056	0.0003	0.00042	0.0011
hsa-miR-125b-1-3p	16	21	52	47	0.00223	0.00317	0.00362	0.00236		hsa-miR-203	3	4	4	9	0.00042	0.0006	0.00028	0.00045
hsa-miR-125b-2-3p	86	63	263	354	0.01196	0.00951	0.01832	0.01774		hsa-miR-211-5p	3	6	12	9	0.00042	0.00091	0.00084	0.00045
hsa-miR-126-3p	44129	38050	101254	182146	6.13928	5.74199	7.05203	9.1302		hsa-mir-212	9	10	12	51	0.00125	0.00151	0.00084	0.00256
hsa-miR-126-5p	4531	4200	5414	6914	0.63036	0.63381	0.37707	0.34657		hsa-miR-215	10	4	11	24	0.00139	0.0006	0.00077	0.0012
hsa-miR-127-3p	185	177	948	1164	0.02574	0.02671	0.06603	0.05835		hsa-miR-216b	3	4	9	14	0.00042	0.0006	0.00063	0.0007
hsa-miR-1275	21	15	42	25	0.00292	0.00226	0.00293	0.00125		hsa-miR-23b-5p	5	5	20	16	0.0007	0.00075	0.00139	0.0008
hsa-miR-127-5p	97	114	332	457	0.01349	0.0172	0.02312	0.02291		hsa-miR-24-1-5p	2	5	12	13	0.00028	0.00075	0.00084	0.00065
hsa-miR-128	178	153	547	585	0.02476	0.02309	0.0381	0.02932		hsa-miR-26a-1-3p	2	1	5	5	0.00028	0.00015	0.00035	0.00025
hsa-miR-1285-3p	48	32	73	115	0.00668	0.00483	0.00508	0.00576		hsa-miR-26a-2-3p	1	1	10	7	0.00014	0.00015	0.0007	0.00035
hsa-miR-1292	14	9	24	41	0.00195	0.00136	0.00167	0.00206		hsa-miR-26b-3p	4	4	18	10	0.00056	0.0006	0.00125	0.0005
hsa-miR-1296	127	77	311	253	0.01767	0.01162	0.02166	0.01268		hsa-miR-30c-1-3p	7	5	34	24	0.00097	0.00075	0.00237	0.0012
hsa-miR-1301	156	117	324	565	0.0217	0.01766	0.02257	0.02832		hsa-miR-32-3p	4	1	14	5	0.00056	0.00015	0.00098	0.00025
hsa-miR-1307-3p	205	200	639	761	0.02852	0.03018	0.0445	0.03815		hsa-miR-323a-5p	5	2	13	18	0.0007	0.0003	0.00091	0.0009
hsa-miR-130a-3p	4938	4770	13946	19052	0.68698	0.71982	0.9713	0.955		hsa-miR-330-5p	7	7	22	33	0.00097	0.00106	0.00153	0.00165
hsa-miR-130b-3p	1693	1501	3459	4166	0.23553	0.22651	0.24091	0.20882		hsa-miR-331-3p	2	1	2	3	0.00028	0.00015	0.00014	0.00015
hsa-miR-130b-5p	217	179	666	842	0.03019	0.02701	0.04638	0.04221		hsa-miR-335-3p	3	3	18	6	0.00042	0.00045	0.00125	0.0003
hsa-miR-132-3p	58	35	139	454	0.00807	0.00528	0.00968	0.02276		hsa-miR-33a-5p	1	16	74	42	0.00014	0.00241	0.00515	0.00211
hsa-miR-132-5p	16	11	32	97	0.00223	0.00166	0.00223	0.00486		hsa-miR-374a-3p	6	4	18	13	0.00083	0.0006	0.00125	0.00065
hsa-miR-134	551	560	985	1715	0.07666	0.08451	0.0686	0.08597		hsa-miR-380-5p	10	12	12	27	0.00139	0.00181	0.00084	0.00135
hsa-miR-136-5p	84	109	348	366	0.01169	0.01645	0.02424	0.01835		hsa-miR-421	5	2	6	8	0.0007	0.0003	0.00042	0.0004
hsa-miR-136-3p	91	85	173	162	0.01266	0.01283	0.01205	0.00812		hsa-miR-424-3p	2	4	39	64	0.00028	0.0006	0.00272	0.00321
hsa-miR-137	177	152	513	551	0.02462	0.02294	0.03573	0.02762		hsa-miR-431-3p	6	6	1	3	0.00083	0.00091	7e-05	0.00015
hsa-miR-138-5p	230	239	481	675	0.032	0.03607	0.0335	0.03383		hsa-miR-449a	8	5	14	37	0.00111	0.00075	0.00098	0.00185
hsa-miR-139-3p	8	13	61	173	0.00111	0.00196	0.00425	0.00867		hsa-miR-449b-5p	1	2	4	4	0.00014	0.0003	0.00028	0.0002
hsa-miR-139-5p	473	487	803	3332	0.0658	0.07349	0.05593	0.16702		hsa-miR-450a-5p	7	10	43	36	0.00097	0.00151	0.00299	0.0018
hsa-miR-140-3p	621	491	690	1001	0.08639	0.0741	0.04806	0.05018		hsa-miR-450b-5p	6	5	37	68	0.00083	0.00075	0.00258	0.00341
hsa-miR-140-5p	114	106	509	704	0.01586	0.016	0.03545	0.03529		hsa-mir-451a	7	10	12	15	0.00097	0.00151	0.00084	0.00075
hsa-miR-145-5p	14	8	24	16	0.00195	0.00121	0.00167	0.0008		hsa-miR-485-5p	5	10	21	39	0.0007	0.00151	0.00146	0.00195
hsa-miR-146a-5p	161	181	1214	2158	0.0224	0.02731	0.08455	0.10817		hsa-miR-486-5p	2	3	12	18	0.00028	0.00045	0.00084	0.0009
hsa-miR-146b-5p	19	21	141	188	0.00264	0.00317	0.00982	0.00942		hsa-miR-497-3p	1	3	22	18	0.00014	0.00045	0.00153	0.0009
hsa-miR-148a-3p	94	73	414	329	0.01308	0.01102	0.02883	0.01649		hsa-miR-539-5p	4	2	16	6	0.00056	0.0003	0.00111	0.0003
hsa-miR-148b-3p	501	452	1627	2278	0.0697	0.06821	0.11332	0.11419		hsa-miR-541-3p	1	2	3	4	0.00014	0.0003	0.00021	0.0002
hsa-miR-148b-5p	22	20	59	43	0.00306	0.00302	0.00411	0.00216		hsa-miR-541-5p	5	6	24	23	0.0007	0.00091	0.00167	0.00115
hsa-miR-149-5p	64	64	239	304	0.0089	0.00966	0.01665	0.01524		hsa-miR-548d-3p	1	3	9	4	0.00014	0.00045	0.00063	0.0002
hsa-miR-150-5p	8	8	25	193	0.00111	0.00121	0.00174	0.00967		hsa-miR-551b-3p	3	1	2	5	0.00042	0.00015	0.00014	0.00025
hsa-miR-151a-3p	682	540	1262	2282	0.09488	0.08149	0.08789	0.11439		hsa-miR-576-3p	7	3	5	13	0.00097	0.00045	0.00035	0.00065
hsa-miR-151a-5p	3263	2916	8008	12361	0.45395	0.44004	0.55773	0.6196		hsa-miR-576-5p	12	5	11	19	0.00167	0.00075	0.00077	0.00095
hsa-miR-152	182	149	561	862	0.02532	0.02249	0.03907	0.04321		hsa-miR-589-5p	3	3	19	14	0.00042	0.00045	0.00132	0.0007
hsa-miR-154-5p	75	74	217	333	0.01043	0.01117	0.01511	0.01669		hsa-miR-592	1	1	3	4	0.00014	0.00015	0.00021	0.0002
hsa-miR-154-3p	87	93	245	121	0.0121	0.01403	0.01706	0.00607		hsa-miR-597	6	6	13	10	0.00083	0.00091	0.00091	0.0005
hsa-miR-155-5p	1366	1396	4482	6697	0.19004	0.21067	0.31216	0.33569		hsa-miR-615-3p	7	5	14	17	0.00097	0.00075	0.00098	0.00085
hsa-miR-15a-5p	25	13	292	130	0.00348	0.00196	0.02034	0.00652		hsa-miR-624-5p	5	9	24	26	0.0007	0.00136	0.00167	0.0013
hsa-miR-15b-5p	474	335	2520	1745	0.06594	0.05055	0.17551	0.08747		hsa-miR-628-5p	5	7	18	18	0.0007	0.00106	0.00125	0.0009
hsa-miR-16-5p	1072	522	4468	3172	0.14914	0.07877	0.31118	0.159		hsa-miR-636	3	3	8	12	0.00042	0.00045	0.00056	0.0006
hsa-miR-16-2-3p	25	34	65	39	0.00348	0.00513	0.00453	0.00195		hsa-miR-641	11	9	12	18	0.00153	0.00136	0.00084	0.0009
hsa-miR-17-5p	12478	10329	19617	24085	1.73595	1.55871	1.36626	1.20728		hsa-miR-643	2	1	4	3	0.00028	0.00015	0.00028	0.00015
hsa-miR-17-3p	131	103	366	285	0.01822	0.01554	0.02549	0.01429		hsa-miR-651	1	3	3	5	0.00014	0.00045	0.00021	0.00025
hsa-miR-181a-5p	949	947	1414	1805	0.13203	0.14291	0.09848	0.09048		hsa-miR-655	2	2	26	7	0.00028	0.0003	0.00181	0.00035
hsa-miR-181a-3p	277	338	442	665	0.03854	0.05101	0.03078	0.03333		hsa-miR-744-3p	1	4	14	11	0.00014	0.0006	0.00098	0.00055
hsa-miR-181a-2-3p	99	128	231	389	0.01377	0.01932	0.01609	0.0195		hsa-miR-942	7	6	40	31	0.00097	0.00091	0.00279	0.00155
hsa-miR-181b-5p	6686	4774	9863	17611	0.93016	0.72043	0.68693	0.88276		hsa-miR-95	1	1	1	6	0.00014	0.00015	7e-05	0.0003
hsa-miR-181c-5p	94	130	356	512	0.01308	0.01962	0.02479	0.02566
hsa-miR-181c-3p	52	61	134	276	0.00723	0.00921	0.00933	0.01383
hsa-miR-181d	104	71	92	176	0.01447	0.01071	0.00641	0.00882
hsa-miR-185-5p	166	80	1159	838	0.02309	0.01207	0.08072	0.04201
hsa-miR-186-5p	103	86	480	323	0.01433	0.01298	0.03343	0.01619
hsa-miR-188-5p	102	105	513	364	0.01419	0.01585	0.03573	0.01825
hsa-miR-18a-5p	4286	3448	11413	10368	0.59627	0.52033	0.79488	0.5197
hsa-miR-18a-3p	59	38	226	181	0.00821	0.00573	0.01574	0.00907
hsa-miR-18b-5p	412	363	1369	1005	0.05732	0.05478	0.09535	0.05038
hsa-miR-1908	11	5	34	26	0.00153	0.00075	0.00237	0.0013
hsa-miR-191-5p	4962	4226	7218	12644	0.69032	0.63773	0.50271	0.63379
hsa-miR-191-3p	23	17	17	19	0.0032	0.00257	0.00118	0.00095
hsa-miR-192-5p	61	53	85	183	0.00849	0.008	0.00592	0.00917
hsa-miR-193a-3p	35	27	316	139	0.00487	0.00407	0.02201	0.00697
hsa-miR-193a-5p	878	774	1721	2880	0.12215	0.1168	0.11986	0.14436
hsa-miR-193b-3p	1275	1246	2897	4206	0.17738	0.18803	0.20177	0.21083
hsa-miR-195-5p	47	17	193	127	0.00654	0.00257	0.01344	0.00637
hsa-miR-196b-5p	206	177	1075	1458	0.02866	0.02671	0.07487	0.07308
hsa-miR-197-3p	206	158	690	970	0.02866	0.02384	0.04806	0.04862
hsa-miR-199a-3p	1740	1555	2879	4509	0.24207	0.23466	0.20051	0.22602
hsa-miR-199a-5p	542	468	1196	835	0.0754	0.07062	0.0833	0.04185
hsa-miR-199b-5p	9	9	19	10	0.00125	0.00136	0.00132	0.0005
hsa-miR-19a-3p	1327	751	4416	4245	0.18461	0.11333	0.30756	0.21278
hsa-miR-19b-3p	13684	10745	25429	29141	1.90373	1.62149	1.77105	1.46071
hsa-miR-19b-1-5p	29	14	36	38	0.00403	0.00211	0.00251	0.0019
hsa-miR-204-5p	83	54	148	120	0.01155	0.00815	0.01031	0.00602
hsa-miR-20a-5p	8169	7259	25520	23828	1.13648	1.09543	1.77739	1.1944
hsa-miR-20a-3p	46	19	71	79	0.0064	0.00287	0.00494	0.00396
hsa-miR-20b-5p	13	9	18	32	0.00181	0.00136	0.00125	0.0016
hsa-miR-21-5p	250982	254477	422888	526104	34.9169	38.4022	29.4528	26.3713
hsa-miR-21-3p	13	24	52	31	0.00181	0.00362	0.00362	0.00155
hsa-miR-210	90	925	289	2780	0.01252	0.13959	0.02013	0.13935
hsa-miR-2110	15	15	127	221	0.00209	0.00226	0.00885	0.01108
hsa-miR-214-3p	40	29	155	142	0.00556	0.00438	0.0108	0.00712
hsa-miR-214-5p	414	397	595	622	0.0576	0.05991	0.04144	0.03118
hsa-miR-216a	74	127	938	1406	0.01029	0.01917	0.06533	0.07048
hsa-miR-217	10	3	111	43	0.00139	0.00045	0.00773	0.00216
hsa-miR-218-5p	308	287	610	584	0.04285	0.04331	0.04248	0.02927
hsa-miR-22-3p	700	524	2397	2942	0.09738	0.07908	0.16694	0.14747
hsa-miR-22-5p	154	139	344	319	0.02142	0.02098	0.02396	0.01599
hsa-miR-221-3p	39291	33804	39461	45292	5.46621	5.10124	2.74834	2.27029
hsa-miR-221-5p	103	53	265	170	0.01433	0.008	0.01846	0.00852
hsa-miR-222-3p	21837	19699	35339	48428	3.03799	2.97271	2.46125	2.42749
hsa-miR-222-5p	267	265	244	116	0.03715	0.03999	0.01699	0.00581
hsa-miR-224-5p	66	52	133	162	0.00918	0.00785	0.00926	0.00812
hsa-miR-224-3p	87	50	82	99	0.0121	0.00755	0.00571	0.00496
hsa-miR-23a-3p	24523	19872	27445	35349	3.41167	2.99881	1.91146	1.77189
hsa-miR-23a-5p	67	58	197	234	0.00932	0.00875	0.01372	0.01173
hsa-miR-23b-3p	12406	10509	19992	24634	1.72594	1.58588	1.39238	1.2348
hsa-miR-24-3p	725	381	2175	1739	0.10086	0.0575	0.15148	0.08717
hsa-miR-24-2-5p	252	257	856	1007	0.03506	0.03878	0.05962	0.05048
hsa-miR-25-3p	169	98	235	476	0.02351	0.01479	0.01637	0.02386
hsa-miR-25-5p	8	17	38	49	0.00111	0.00257	0.00265	0.00246
hsa-miR-26a-5p	6769	6754	20458	45770	0.94171	1.01922	1.42484	2.29425
hsa-miR-26b-5p	955	1069	3021	4552	0.13286	0.16132	0.2104	0.22817
hsa-miR-27a-3p	6629	6806	11681	15942	0.92223	1.02707	0.81355	0.7991
hsa-miR-27a-5p	168	147	268	312	0.02337	0.02218	0.01867	0.01564
hsa-miR-27b-3p	1692	1803	3544	5514	0.23539	0.27208	0.24683	0.27639
hsa-miR-27b-5p	9	7	18	21	0.00125	0.00106	0.00125	0.00105
hsa-miR-28-3p	51	36	125	150	0.0071	0.00543	0.00871	0.00752
hsa-miR-28-5p	53	59	283	281	0.00737	0.0089	0.01971	0.01409
hsa-miR-296-5p	9	7	15	13	0.00125	0.00106	0.00104	0.00065
hsa-miR-299-3p	71	86	194	213	0.00988	0.01298	0.01351	0.01068
hsa-miR-299-5p	82	84	311	399	0.01141	0.01268	0.02166	0.02
hsa-miR-29a-3p	15226	12828	34787	32759	2.11826	1.93583	2.42281	1.64207
hsa-miR-29a-5p	35	17	62	49	0.00487	0.00257	0.00432	0.00246
hsa-miR-29b-3p	757	644	2644	1058	0.10531	0.09718	0.18415	0.05303
hsa-miR-29b-1-5p	81	68	250	258	0.01127	0.01026	0.01741	0.01293
hsa-miR-29b-2-5p	41	21	100	122	0.0057	0.00317	0.00696	0.00612
hsa-miR-29c-3p	794	662	1736	1170	0.11046	0.0999	0.12091	0.05865
hsa-miR-29c-5p	188	166	208	271	0.02615	0.02505	0.01449	0.01358
hsa-miR-301a-3p	720	712	2048	2513	0.10017	0.10745	0.14264	0.12597
hsa-miR-301b	52	53	88	162	0.00723	0.008	0.00613	0.00812
hsa-miR-30a-5p	11688	12041	34940	53155	1.62605	1.81707	2.43346	2.66443
hsa-miR-30a-3p	162	128	540	857	0.02254	0.01932	0.03761	0.04296
hsa-miR-30b-5p	1579	1613	6382	7095	0.21967	0.24341	0.44449	0.35564
hsa-miR-30b-3p	9	11	15	34	0.00125	0.00166	0.00104	0.0017
hsa-miR-30c-5p	3465	3277	14729	15906	0.48205	0.49452	1.02583	0.7973
hsa-miR-30c-2-3p	37	35	106	132	0.00515	0.00528	0.00738	0.00662
hsa-miR-30d-5p	4860	5838	11364	25715	0.67613	0.88099	0.79147	1.28898
hsa-miR-30e-5p	995	913	3367	4390	0.13843	0.13778	0.2345	0.22005
hsa-miR-30e-3p	89	79	253	371	0.01238	0.01192	0.01762	0.0186
hsa-miR-31-5p	34263	27692	40983	55544	4.76671	4.1789	2.85434	2.78418
hsa-miR-31-3p	463	306	838	685	0.06441	0.04618	0.05836	0.03434
hsa-miR-32-5p	28	13	83	70	0.0039	0.00196	0.00578	0.00351
hsa-miR-320a	4703	3861	12766	23144	0.65429	0.58265	0.88911	1.16011
hsa-miR-320b	683	488	2177	3342	0.09502	0.07364	0.15162	0.16752
hsa-miR-320c	1622	1308	4090	6564	0.22565	0.19739	0.28486	0.32903
hsa-miR-323a-3p	58	44	102	104	0.00807	0.00664	0.0071	0.00521
hsa-miR-324-3p	81	67	420	629	0.01127	0.01011	0.02925	0.03153
hsa-miR-324-5p	529	543	2558	3841	0.0736	0.08194	0.17816	0.19253
hsa-miR-326	20	13	81	77	0.00278	0.00196	0.00564	0.00386
hsa-miR-328	121	149	334	752	0.01683	0.02249	0.02326	0.03769
hsa-miR-329	83	92	341	282	0.01155	0.01388	0.02375	0.01414
hsa-miR-330-3p	23	8	45	32	0.0032	0.00121	0.00313	0.0016
hsa-miR-331-5p	19	19	47	58	0.00264	0.00287	0.00327	0.00291
hsa-miR-335-5p	12	8	83	123	0.00167	0.00121	0.00578	0.00617
hsa-miR-337-3p	25	30	41	73	0.00348	0.00453	0.00286	0.00366
hsa-miR-337-5p	24	27	87	106	0.00334	0.00407	0.00606	0.00531
hsa-miR-339-3p	105	57	172	240	0.01461	0.0086	0.01198	0.01203
hsa-miR-339-5p	186	91	490	251	0.02588	0.01373	0.03413	0.01258
hsa-miR-33a-3p	74	93	262	275	0.01029	0.01403	0.01825	0.01378
hsa-miR-340-5p	94	81	371	455	0.01308	0.01222	0.02584	0.02281
hsa-miR-340-3p	16	15	80	95	0.00223	0.00226	0.00557	0.00476
hsa-miR-342-3p	16	7	30	49	0.00223	0.00106	0.00209	0.00246
hsa-miR-342-5p	18	14	52	90	0.0025	0.00211	0.00362	0.00451
hsa-miR-345-5p	1275	1342	3547	5921	0.17738	0.20252	0.24704	0.29679
hsa-miR-34a-5p	1041	1163	1715	2091	0.14483	0.1755	0.11944	0.10481
hsa-miR-34a-3p	35	24	66	42	0.00487	0.00362	0.0046	0.00211
hsa-miR-361-3p	188	165	151	269	0.02615	0.0249	0.01052	0.01348
hsa-miR-361-5p	258	133	1208	1045	0.03589	0.02007	0.08413	0.05238
hsa-miR-362-3p	63	48	149	133	0.00876	0.00724	0.01038	0.00667
hsa-miR-362-5p	41	33	200	227	0.0057	0.00498	0.01393	0.01138
hsa-miR-365a-3p	232	173	1076	1322	0.03228	0.02611	0.07494	0.06627
hsa-miR-365a-5p	9	13	42	35	0.00125	0.00196	0.00293	0.00175
hsa-miR-369-3p	90	78	365	288	0.01252	0.01177	0.02542	0.01444
hsa-miR-369-5p	45	37	163	210	0.00626	0.00558	0.01135	0.01053
hsa-miR-370	316	299	1320	2728	0.04396	0.04512	0.09193	0.13674
hsa-miR-374a-5p	86	65	389	453	0.01196	0.00981	0.02709	0.02271
hsa-miR-374b-5p	228	189	985	942	0.03172	0.02852	0.0686	0.04722
hsa-miR-376a-3p	1309	1150	1656	1500	0.18211	0.17354	0.11534	0.07519
hsa-miR-376a-5p	8	19	97	61	0.00111	0.00287	0.00676	0.00306
hsa-miR-376b	1044	1053	2430	2341	0.14524	0.1589	0.16924	0.11734
hsa-miR-376c	3829	3885	6533	10744	0.53269	0.58627	0.455	0.53855
hsa-miR-377-3p	13	9	34	26	0.00181	0.00136	0.00237	0.0013
hsa-miR-377-5p	15	14	51	42	0.00209	0.00211	0.00355	0.00211
hsa-miR-378a-3p	648	458	1363	1445	0.09015	0.06912	0.09493	0.07243
hsa-miR-378a-5p	89	75	146	158	0.01238	0.01132	0.01017	0.00792
hsa-miR-379-5p	170	177	475	559	0.02365	0.02671	0.03308	0.02802
hsa-miR-379-3p	12	19	28	21	0.00167	0.00287	0.00195	0.00105
hsa-miR-380-3p	52	52	101	93	0.00723	0.00785	0.00703	0.00466
hsa-miR-381	209	164	674	494	0.02908	0.02475	0.04694	0.02476
hsa-miR-382-5p	452	444	1294	2403	0.06288	0.067	0.09012	0.12045
hsa-miR-409-3p	1222	1110	2283	4251	0.17001	0.16751	0.159	0.21308
hsa-miR-409-5p	36	30	140	133	0.00501	0.00453	0.00975	0.00667
hsa-miR-410	35	25	88	109	0.00487	0.00377	0.00613	0.00546
hsa-miR-411-5p	151	145	194	319	0.02101	0.02188	0.01351	0.01599
hsa-miR-411-3p	83	68	160	215	0.01155	0.01026	0.01114	0.01078
hsa-miR-423-3p	439	301	1680	1865	0.06107	0.04542	0.11701	0.09348
hsa-miR-423-5p	259	187	998	1286	0.03603	0.02822	0.06951	0.06446
hsa-miR-424-5p	12	11	57	56	0.00167	0.00166	0.00397	0.00281
hsa-miR-425-5p	387	423	1471	1543	0.05384	0.06383	0.10245	0.07734
hsa-miR-425-3p	54	40	118	112	0.00751	0.00604	0.00822	0.00561
hsa-miR-431-5p	17	24	34	38	0.00237	0.00362	0.00237	0.0019
hsa-miR-432-5p	168	158	614	1127	0.02337	0.02384	0.04276	0.05649
hsa-miR-433	144	143	247	416	0.02003	0.02158	0.0172	0.02085
hsa-miR-452-5p	27	17	50	52	0.00376	0.00257	0.00348	0.00261
hsa-miR-454-5p	9	5	19	14	0.00125	0.00075	0.00132	0.0007
hsa-miR-455-3p	1006	728	1366	1937	0.13996	0.10986	0.09514	0.09709
hsa-miR-455-5p	46	35	137	101	0.0064	0.00528	0.00954	0.00506
hsa-miR-484	2890	2599	9818	16143	0.40206	0.39221	0.68379	0.80918
hsa-miR-485-3p	444	401	759	1111	0.06177	0.06051	0.05286	0.05569
hsa-miR-487a	260	213	243	323	0.03617	0.03214	0.01692	0.01619
hsa-miR-487b	280	215	931	723	0.03895	0.03244	0.06484	0.03624
hsa-miR-491-3p	12	9	38	16	0.00167	0.00136	0.00265	0.0008
hsa-miR-491-5p	19	15	60	76	0.00264	0.00226	0.00418	0.00381
hsa-miR-493-3p	30	38	126	165	0.00417	0.00573	0.00878	0.00827
hsa-miR-493-5p	123	117	295	326	0.01711	0.01766	0.02055	0.01634
hsa-miR-494	2865	2581	4561	7309	0.39858	0.38949	0.31766	0.36637
hsa-miR-495	441	300	620	707	0.06135	0.04527	0.04318	0.03544
hsa-miR-496	20	29	58	56	0.00278	0.00438	0.00404	0.00281
hsa-miR-497-5p	14	16	117	111	0.00195	0.00241	0.00815	0.00556
hsa-miR-500a-5p	72	76	320	333	0.01002	0.01147	0.02229	0.01669
hsa-miR-500a-3p	124	134	255	411	0.01725	0.02022	0.01776	0.0206
hsa-miR-501-3p	71	58	124	219	0.00988	0.00875	0.00864	0.01098
hsa-miR-501-5p	88	82	299	459	0.01224	0.01237	0.02082	0.02301
hsa-miR-502-3p	210	217	598	963	0.02922	0.03275	0.04165	0.04827
hsa-miR-502-5p	46	57	179	183	0.0064	0.0086	0.01247	0.00917
hsa-miR-503	45	55	681	861	0.00626	0.0083	0.04743	0.04316
hsa-miR-505-3p	816	678	1272	2289	0.11352	0.10231	0.08859	0.11474
hsa-miR-505-5p	55	60	117	141	0.00765	0.00905	0.00815	0.00707
hsa-miR-532-3p	184	125	432	570	0.0256	0.01886	0.03009	0.02857
hsa-miR-532-5p	1158	932	1321	1962	0.1611	0.14064	0.092	0.09835
hsa-miR-542-3p	10	30	69	120	0.00139	0.00453	0.00481	0.00602
hsa-miR-542-5p	8	24	60	102	0.00111	0.00362	0.00418	0.00511
hsa-miR-543	212	127	294	270	0.02949	0.01917	0.02048	0.01353
hsa-miR-545-5p	38	42	118	146	0.00529	0.00634	0.00822	0.00732
hsa-miR-548k	12	8	17	23	0.00167	0.00121	0.00118	0.00115
hsa-miR-550a-5p	29	21	29	54	0.00403	0.00317	0.00202	0.00271
hsa-miR-550a-3p	120	86	274	264	0.01669	0.01298	0.01908	0.01323
hsa-miR-551a	21	29	43	60	0.00292	0.00438	0.00299	0.00301
hsa-miR-574-3p	2075	1914	3525	7103	0.28868	0.28884	0.24551	0.35604
hsa-miR-574-5p	82	117	1263	1831	0.01141	0.01766	0.08796	0.09178
hsa-miR-579	19	18	82	87	0.00264	0.00272	0.00571	0.00436
hsa-miR-582-3p	35	24	76	100	0.00487	0.00362	0.00529	0.00501
hsa-miR-582-5p	60	30	347	274	0.00835	0.00453	0.02417	0.01373
hsa-miR-584-5p	62	50	244	343	0.00863	0.00755	0.01699	0.01719
hsa-miR-589-3p	15	15	38	25	0.00209	0.00226	0.00265	0.00125
hsa-miR-590-3p	68	54	188	171	0.00946	0.00815	0.01309	0.00857
hsa-miR-590-5p	636	596	1603	1677	0.08848	0.08994	0.11164	0.08406
hsa-miR-598	16	35	102	108	0.00223	0.00528	0.0071	0.00541
hsa-miR-616-5p	12	9	22	29	0.00167	0.00136	0.00153	0.00145
hsa-miR-625-5p	23	8	30	42	0.0032	0.00121	0.00209	0.00211
hsa-miR-625-3p	142	87	182	165	0.01976	0.01313	0.01268	0.00827
hsa-miR-627	8	8	38	38	0.00111	0.00121	0.00265	0.0019
hsa-miR-628-3p	24	19	47	72	0.00334	0.00287	0.00327	0.00361
hsa-miR-629-5p	170	113	369	415	0.02365	0.01705	0.0257	0.0208
hsa-miR-629-3p	17	13	50	35	0.00237	0.00196	0.00348	0.00175
hsa-miR-652-3p	137	81	298	386	0.01906	0.01222	0.02075	0.01935
hsa-miR-654-3p	140	135	396	496	0.01948	0.02037	0.02758	0.02486
hsa-miR-654-5p	30	26	46	69	0.00417	0.00392	0.0032	0.00346
hsa-miR-656	118	63	254	252	0.01642	0.00951	0.01769	0.01263
hsa-miR-660-5p	340	192	811	884	0.0473	0.02897	0.05648	0.04431
hsa-miR-664-3p	33	31	46	62	0.00459	0.00468	0.0032	0.00311
hsa-miR-665	84	85	418	421	0.01169	0.01283	0.02911	0.0211
hsa-miR-668	23	17	36	72	0.0032	0.00257	0.00251	0.00361
hsa-miR-671-3p	50	38	63	100	0.00696	0.00573	0.00439	0.00501
hsa-miR-671-5p	1231	1078	2674	3093	0.17126	0.16268	0.18624	0.15504
hsa-miR-7-5p	684	524	1547	487	0.09516	0.07908	0.10774	0.02441
hsa-miR-744-5p	302	230	726	943	0.04201	0.03471	0.05056	0.04727
hsa-miR-758	24	25	112	67	0.00334	0.00377	0.0078	0.00336
hsa-miR-760	8	2	40	48	0.00111	0.0003	0.00279	0.00241
hsa-miR-766-3p	21	18	91	64	0.00292	0.00272	0.00634	0.00321
hsa-miR-769-3p	21	21	95	142	0.00292	0.00317	0.00662	0.00712
hsa-miR-769-5p	178	178	349	389	0.02476	0.02686	0.02431	0.0195
hsa-miR-770-5p	11	4	17	17	0.00153	0.0006	0.00118	0.00085
hsa-miR-874	33	17	71	75	0.00459	0.00257	0.00494	0.00376
hsa-miR-877-5p	100	62	193	287	0.01391	0.00936	0.01344	0.01439
hsa-miR-877-3p	12	11	104	84	0.00167	0.00166	0.00724	0.00421
hsa-miR-887	552	510	1224	2002	0.07679	0.07696	0.08525	0.10035
hsa-miR-889	32	22	70	49	0.00445	0.00332	0.00488	0.00246
hsa-miR-92a-3p	11471	8817	22460	26450	1.59586	1.33054	1.56427	1.32583
hsa-miR-92a-1-5p	60	55	135	116	0.00835	0.0083	0.0094	0.00581
hsa-miR-92b-3p	115	79	296	244	0.016	0.01192	0.02062	0.01223
hsa-miR-92b-5p	45	34	104	106	0.00626	0.00513	0.00724	0.00531
hsa-miR-93-5p	8224	7655	15601	28539	1.14413	1.15519	1.08656	1.43054
hsa-miR-93-3p	181	199	349	552	0.02518	0.03003	0.02431	0.02767
hsa-miR-935	110	98	360	478	0.0153	0.01479	0.02507	0.02396
hsa-miR-940	106	119	395	406	0.01475	0.01796	0.02751	0.02035
hsa-miR-941	66	47	111	142	0.00918	0.00709	0.00773	0.00712
hsa-miR-98	297	320	1597	1857	0.04132	0.04829	0.11123	0.09308
hsa-miR-99a-5p	2968	2360	7285	11573	0.41291	0.35614	0.50738	0.5801
hsa-miR-99b-5p	753	428	1418	1973	0.10476	0.06459	0.09876	0.0989
hsa-miR-99b-3p	140	122	424	635	0.01948	0.01841	0.02953	0.03183
