# Supplementary material
Source: HighWire-hosted journal article supplement (doi:10.1101/rna.027615.111)
Supplement: Supp_Table_S3.xlsx [file Supp_Table_S3.xlsx]

## Sheet: Foglio1
Candidate miRNAs
Candidate_ID	Genomic Position					Raw Counts				Predicted Candidate Hairpin						Genomic Context
	Chromosome	Genomic Strand	Start Position	End Position	Candidate Sequence	Normoxic HUVEC_1	Hypoxic HUVEC_1	Normoxic HUVEC_2	Hypoxic HUVEC_2	Chromosome	Genomic Strand	Start Position	End Position	Hairpin Length	Free Energy (kcal/mol)	Genomic Context	Genomic Strand	Sense or Antisense to Host	Clustering with annotated miRNAs
10	chr1	+	2360637	2360656	GGGGAGAGAGACATGCCGAC	45	32	179	114	chr1	-	2360572	2360682	110	-50.5	Extragenic		N/A
34	chr1	+	10926266	10926286	CCTCTCACTGTCATTAAGGAT	24	13	134	72	chr1	+	10926208	10926279	71	-33.4	Extragenic		N/A
36	chr1	+	11007397	11007415	AGCGCCTCTTCCCTCGGGG	106	52	0	0	chr1	-	11007315	11007419	104	-41.9	Intron	-	Antisense
53	chr1	+	20960249	20960268	TTCCGCCAGTCGGTGGCCGG	26	48	127	309	chr1	+	20960172	20960281	109	-57.1	Exon Other	+	Sense
58	chr1	+	22288408	22288427	ATTGGAGGCTCAGAGGCTCA	86	107	33	25	chr1	-	22288399	22288477	78	-43.1	Extragenic		N/A
60	chr1	-	22929101	22929119	GGGAAGGCATCAGAGGCTA	358	790	13	11	chr1	-	22929053	22929144	91	-39.9	Exon Other	+	Antisense
66	chr1	+	24579652	24579671	GGCCAAGGCGGTAAATGATG	787	731	40	43	chr1	-	24579562	24579669	107	-32.3	Extragenic		N/A
70	chr1	+	27862714	27862734	CCTCGGCTGCTGTCTGCTGGG	4	1	64	128	chr1	-	27862709	27862796	87	-38.2	Intron	-	Antisense
79	chr1	-	32758256	32758275	GGCCCCGCTCAGAGGCTGGG	80	181	5	1	chr1	+	32758232	32758336	104	-51.4	Intron	+	Antisense
93	chr1	-	40428600	40428620	ATTGTAGTCTCCGATAGCAAC	307	273	85	36	chr1	+	40428607	40428713	106	-44.2	Intron	+	Antisense
96	chr1	-	41451148	41451168	AGCTGTGCCAGTGAAAGCTTG	253	216	533	520	chr1	-	41451096	41451163	67	-30.1	Intron	+	Antisense
97	chr1	+	41940557	41940577	GCAGGCCAAGGCGAGGCCCAC	261	111	25	8	chr1	+	41940559	41940636	77	-38	Extragenic		N/A
105	chr1	-	43524388	43524408	TCTGCTGAGTCAGCAGGAAGT	189	144	345	364	chr1	+	43524306	43524416	110	-58	Extragenic		N/A
112	chr1	+	44304329	44304352	TTGGAAGCTTGGACCAACTAGCTG	342	133	744	56	chr1	-	44304262	44304355	93	-33.5	Intron	+	Sense
113	chr1	+	45056229	45056249	TTCTCTGCTGTGTCCGGTTCC	40	28	130	67	chr1	-	45056238	45056341	103	-39.1	Intron	+	Sense
115	chr1	+	45770123	45770144	AACCTTACTCTCTCCCTCGGGA	506	450	74	20	chr1	-	45770035	45770141	106	-36.2	Exon 1 of 1	+	Sense
118	chr1	+	46943759	46943777	GGCGTTCCCTATAGACCTC	871	762	15	49	chr1	+	46943748	46943843	95	-41.4	Extragenic		N/A
119	chr1	+	47891063	47891081	CCTTATCTGGAGGCTGGAC	39	235	2	0	chr1	+	47891031	47891127	96	-30.3	Extragenic		N/A
121	chr1	+	49214386	49214405	GGGGGAGATCACTGCCGGTT	81	46	444	227	chr1	+	49214363	49214474	111	-31.9	Intron	-	Antisense
138	chr1	-	58715273	58715292	ATTTCCTCGCTCAGTCCGCG	79	61	119	45	chr1	-	58715267	58715352	85	-30.9	Intron	-	Sense
139	chr1	-	59238790	59238808	ATATGGAATCCTGAGAAAG	149	71	5	4	chr1	+	59238707	59238816	109	-32.6	Extragenic		N/A
140	chr1	-	59538325	59538343	GGCCAAGGCATTCAGAGGA	101	93	8	10	chr1	-	59538297	59538409	112	-37.2	Extragenic		N/A
141	chr1	-	62054069	62054088	GGGGAAGACAGGCATTAAAA	15	7	129	161	chr1	-	62054068	62054168	100	-34.2	Extragenic		N/A
144	chr1	-	63792635	63792655	CCTGCGAGTCTCCGGCGGTGG	857	1508	220	58	chr1	-	63792596	63792651	55	-30.9	Extragenic		N/A
150	chr1	+	71484635	71484655	TAATTGGAATTAGAAGCAGTG	125	98	2	1	chr1	-	71484617	71484729	112	-33	Intron	-	Antisense
155	chr1	+	81909177	81909196	ATTAACCTTATTCCTATTTT	1903	1860	483	212	chr1	-	81909182	81909285	103	-30.3	Intron	+	Sense
157	chr1	-	91080796	91080815	CTCTTATCAAGTCAGCACCA	106	147	110	164	chr1	+	91080715	91080810	95	-36.5	Extragenic		N/A
164	chr1	-	96516252	96516271	CCTTATCAGAGGCTATGCTG	427	352	97	62	chr1	+	96516167	96516278	111	-32.1	Extragenic		N/A
170	chr1	-	109740674	109740693	AAAAGAAGATCACGTCCGGT	101	51	171	88	chr1	-	109740680	109740790	110	-36.3	Exon Other	+	Antisense
178	chr1	+	112543617	112543636	CTTGCATCAGTGGGATGGTG	174	115	15	0	chr1	+	112543622	112543724	102	-32.8	Extragenic		N/A
181	chr1	+	143672933	143672953	GGGAAGAGCTGTACGGCCTTC	11090	7625	89662	72433	chr1	+	143672921	143673002	81	-30.1	Intron	-	Antisense
	chr1	+	147860446	147860466	GGGAAGAGCTGTACGGCCTTC	11090	7625	89662	72433	chr1	+	147860434	147860515	81	-30.1	Intron	-	Antisense
189	chr1	-	151768296	151768315	GAATAGACTCTTAGGACTGG	45	100	10	15	chr1	+	151768222	151768332	110	-31.6	Extragenic		N/A
192	chr1	-	153744411	153744431	CTTGCGAGGCAGGCTGTTGTT	30	172	14	11	chr1	-	153744402	153744489	87	-32.1	Exon Other	+	Antisense
203	chr1	-	160191681	160191703	AAAAGGAAGAGTGAGAATCGAGT	65	157	18	7	chr1	-	160191673	160191766	93	-30.4	Intron	-	Sense
207	chr1	-	161143782	161143804	GAACGTTGGGGTGCGAGAGGCCC	58	106	155	266	chr1	-	161143719	161143801	82	-33.3	Intron	+	Antisense
217	chr1	+	168781148	168781167	TAGAATGAGATGCTGGCAGC	467	385	750	736	chr1	+	168781134	168781230	96	-32.4	Extragenic		N/A
227	chr1	-	183000793	183000811	CTAAAACCCAAACAGAACA	1607	1785	200	333	chr1	+	183000733	183000843	110	-37.7	Intron	+	Antisense
236	chr1	-	201688698	201688716	TTCCTATCCTCTCTTCTAT	185	105	15	1	chr1	+	201688641	201688752	111	-77	Intron	+	Antisense
244	chr1	+	204193483	204193503	TCCTCACTGTAGCCGCGAGGC	12	5	77	105	chr1	+	204193482	204193549	67	-30.1	Intron	-	Antisense
248	chr1	-	204619247	204619265	CCCCCTTGCATCAGAGGCT	370	480	22	5	chr1	-	204619187	204619295	108	-52.6	Intron	-	Sense
255	chr1	+	209125666	209125685	ATTGGAATAGGATTGTGGGT	136	270	146	208	chr1	+	209125674	209125784	110	-45.8	Extragenic		N/A
260	chr1	+	220109373	220109392	AAAAGTAGAGAGAATCAAGG	152	90	1	1	chr1	+	220109310	220109407	97	-31.5	Intron	-	Antisense
261	chr1	-	221052009	221052027	CCCCGGAGCCTCAGAGGCT	120	100	15	8	chr1	+	221051971	221052035	64	-31.4	Extragenic		N/A
262	chr1	+	221524134	221524152	AAGGCTAGAAGATTGAGCA	1	4	91	195	chr1	-	221524126	221524204	78	-32.3	Extragenic		N/A
267	chr1	+	227176625	227176644	TTCTGAGTGCATTAACTCCT	226	117	819	1003	chr1	+	227176619	227176725	106	-30.27	Extragenic		N/A
272	chr1	+	228347303	228347321	CTTCTGCGATGCCGGCCTT	48	36	108	114	chr1	+	228347252	228347334	82	-30.9	Exon Other	+	Sense
275	chr1	+	229112260	229112278	TTTCCGGTAGCAGTTTGGT	16	3	120	208	chr1	+	229112243	229112332	89	-34.1	Extragenic		N/A
282	chr1	+	235032014	235032032	TGGCTGTCAGGCTGGACAG	7	131	1	0	chr1	+	235032002	235032101	99	-39.4	Extragenic		N/A
286	chr1	+	240775852	240775870	TGATATGTCTGACATTCTC	942	695	334	141	chr1	-	240775835	240775928	93	-40.8	Extragenic		N/A
287	chr1	+	240871126	240871145	TATGGAATAAAGTCCTTAGC	84	122	33	6	chr1	-	240871104	240871210	106	-30.5	Extragenic		N/A
291	chr1	+	245770809	245770828	AAACTTCACGACAGAGGCCA	30	128	21	4	chr1	-	245770803	245770899	96	-36.6	Intron	+	Sense
292	chr1	-	245995036	245995055	GTTCCCTTGTCAGTGATGAG	124	62	9	4	chr1	+	245994947	245995058	111	-34.5	Intron	-	Sense
294	chr1	+	247495540	247495558	ATGGAGCGGAGAGAGGAGG	116	90	0	0	chr1	+	247495512	247495622	110	-53.1	Extragenic		N/A
298	chr10	-	2118225	2118246	TCCTCATCACACTGCACCTTAG	136	109	94	60	chr10	-	2118213	2118283	70	-36.7	Extragenic		N/A
299	chr10	+	3319970	3319990	GGGGGAGATCACATAATAAAG	31	12	295	156	chr10	-	3319888	3319993	105	-32.4	Extragenic		N/A
301	chr10	+	4033370	4033388	CCGCCTGAGCTAGCTGTGG	186	67	9	4	chr10	+	4033352	4033451	99	-32.2	Extragenic		N/A
316	chr10	+	21799603	21799623	GAAGCGAGAGAGGAGCGGGGG	102	39	40	26	chr10	-	21799597	21799681	84	-37.4	Extragenic		N/A
342	chr10	-	60903517	60903537	AAGTATCACTCATAGCCTGTC	10	156	0	0	chr10	+	60903481	60903590	109	-30.5	Extragenic		N/A
355	chr10	-	75255764	75255783	CATGCCGGTCTTAGCCCCTC	52	105	7	18	chr10	-	75255717	75255791	74	-30.9	Intron	+	Antisense
363	chr10	-	80523843	80523864	GGAAGGGTTCAGAGGCCATTTT	70	117	7	24	chr10	-	80523834	80523936	102	-46.6	Extragenic		N/A
364	chr10	-	80967406	80967427	GGGTCCGCTCAGAGGCTGCTGG	53	204	16	26	chr10	-	80967391	80967472	81	-35.1	Intron	+	Antisense
383	chr10	+	98229850	98229868	ATTTTCCATCTGAGAATCT	84	145	22	5	chr10	-	98229797	98229887	90	-34.4	Intron	-	Antisense
387	chr10	-	99334509	99334529	GGCTCATTCCAAGCTCTTTCC	77	119	42	30	chr10	-	99334480	99334586	106	-47.1	Intron	+	Antisense
397	chr10	+	103916979	103916997	AAATGGACCAGTGGCTAAG	66	88	115	237	chr10	-	103916914	103917023	109	-37.8	Exon Other	+	Sense
398	chr10	+	104094138	104094156	AGAAAAGGCTGCTGCGGCC	152	50	165	126	chr10	+	104094142	104094241	99	-34.8	Intron	+	Sense
409	chr10	-	112864767	112864787	CCGGTTCCTTTCAGAGGCCGC	109	102	8	11	chr10	+	112864706	112864788	82	-36.5	Extragenic		N/A
415	chr10	+	115544978	115544997	CTTCTGCTGCACGGCTAAGA	78	57	275	25	chr10	-	115544903	115544993	90	-31.5	Extragenic		N/A
417	chr10	-	116060074	116060094	CCTTCCCTGAGAATCACCACC	227	187	36	20	chr10	+	116059996	116060092	96	-39.9	Exon Other	-	Sense
423	chr10	+	120428537	120428555	GCCCTTCCATCACGTAGCT	8	1	43	120	chr10	-	120428518	120428608	90	-42.5	Extragenic		N/A
424	chr10	-	120978078	120978097	CCCCTCCTGAGTGCATTAAC	264	136	367	343	chr10	+	120978009	120978112	103	-34.8	Intron	+	Antisense
426	chr10	-	121302904	121302924	GGCGGCTCGGCTAGCTCAGCG	13	16	55	107	chr10	+	121302823	121302926	103	-52.3	Extragenic		N/A
427	chr10	-	123383202	123383222	GCTTTCCACAGCATGCTGAG0	101	73	0	1	chr10	-	123383202	123383291	89	-34.8	Extragenic		N/A
428	chr10	+	123422597	123422616	GAGTAGCTGAGTTAGTGGTG	97	163	16	4	chr10	+	123422573	123422678	105	-41.6	Extragenic		N/A
429	chr10	+	124379527	124379546	CCCTTCGTAGCTGAGAAGAG	101	60	3	0	chr10	+	124379438	124379549	111	-39.9	Intron	+	Sense
444	chr10	+	132823565	132823584	GGGGAAGAGGACATGGGCCA	56	29	803	652	chr10	+	132823558	132823654	96	-35.7	Extragenic		N/A
463	chr10	-	135139379	135139398	CGGCCAAGGCGGAGAAGGAG	250	157	16	10	chr10	+	135139307	135139399	92	-51.7	Exon Other	-	Sense
465	chr11	-	720850	720869	CGGCCAACGCGCTCTCGATG	123	75	77	84	chr11	+	720783	720871	88	-33.1	Exon Other	+	Antisense
468	chr11	-	805466	805485	GGGGGAGGCTGTACGGCTCC	281	226	877	406	chr11	-	805463	805558	95	-50.5	Extragenic		N/A
479	chr11	-	3072359	3072377	GAGGCTGTGGCCGGTTCCC	42	52	115	104	chr11	+	3072289	3072372	83	-37.2	Intron	-	Sense
480	chr11	-	4605957	4605976	AATTGGACTATGATGAGGAG	379	195	31	11	chr11	-	4605891	4606002	111	-33.8	Extragenic		N/A
482	chr11	+	6566331	6566349	TTTCCTCATGTGCATGCTG	10	5	125	191	chr11	-	6566326	6566433	107	-30.8	Exon Other	+	Sense
484	chr11	-	6691846	6691864	AAAAGGAGTCTGTAGGCAA	104	68	101	70	chr11	+	6691784	6691894	110	-32.9	Extragenic		N/A
486	chr11	-	7687319	7687337	CCCTTCTGCTTACGGCCAC	1143	567	2659	2547	chr11	+	7687278	7687387	109	-30.1	Intron	-	Sense
487	chr11	-	8238662	8238681	AAGGGAAGCATCAGAGGCTC	145	110	9	2	chr11	+	8238663	8238758	95	-48.4	Extragenic		N/A
489	chr11	-	9482951	9482972	ACGCGGCCAAGGCTCCCGAGGG	74	112	3	14	chr11	+	9482959	9483023	64	-30.1	Intron	+	Antisense
492	chr11	-	10845017	10845035	GGCCAAGATTAGTCTCCGA	620	481	43	12	chr11	-	10845016	10845101	85	-31.6	Intron	-	Sense
497	chr11	-	15243221	15243240	GCCAAGGCCCTCTCTCCTAG	224	127	19	11	chr11	+	15243156	15243267	111	-45.1	Intron	+	Antisense
498	chr11	-	15991101	15991120	GGTAGTGAGTTATCAGCTAC	1	7	18	177	chr11	-	15991079	15991167	88	-35.6	Exon Other	-	Sense
499	chr11	-	17627761	17627782	CTTCTTAGGGGTAATTGGAAGG	83	73	181	111	chr11	-	17627732	17627836	104	-38.2	Intron	+	Antisense
503	chr11	+	20297866	20297885	AAGAGACCATGACTTATCGG	6	0	67	102	chr11	-	20297791	20297889	98	-34.6	Extragenic		N/A
509	chr11	-	30734424	30734443	TCTGCTGTACTTAGTTCAAG	287	209	169	131	chr11	+	30734423	30734520	97	-30.3	Extragenic		N/A
518	chr11	+	43602491	43602511	CCTGTAGTCACGGCTGGAACC	400	808	32	14	chr11	-	43602498	43602595	97	-32.5	Extragenic		N/A	hsa-mir-129-2
520	chr11	-	44268215	44268233	CTACGGTGACTGTACCACC	1	17	43	108	chr11	+	44268202	44268314	112	-32.2	Extragenic		N/A
536	chr11	-	57435676	57435694	CCGGTTCCGCAGGGACCGG	118	133	70	207	chr11	+	57435626	57435718	92	-42.5	Intron	+	Antisense
553	chr11	-	64855046	64855067	CTTCTGCTGCACAGCCAAGGCC	255	81	321	266	chr11	-	64855032	64855113	81	-30.9	Intron	+	Antisense
563	chr11	+	67174296	67174316	AGGAGGCTGTGCGGCTGGACG	140	146	582	388	chr11	+	67174265	67174357	92	-41.3	Intron	-	Antisense
571	chr11	-	68705691	68705712	TAACGGCGGCAGAAACCAGGGC	929	633	377	591	chr11	+	68705597	68705704	107	-44.4	Exon Other	+	Antisense
574	chr11	+	69589936	69589956	GGAGCGCACGGCCGACCTCGG	141	93	9	0	chr11	+	69589900	69590011	111	-66.9	Exon Other	-	Antisense
581	chr11	+	70959210	70959228	AAGGCTTGCATCAGAGGCG	1539	1172	133	66	chr11	-	70959213	70959295	82	-36.3	Extragenic		N/A
586	chr11	+	73099446	73099464	AGGGGAAGAGCTGTGGCCA	323	201	401	344	chr11	-	73099405	73099477	72	-34.4	Intron	+	Sense
606	chr11	-	94524621	94524642	AACCTTATCTAAGAATCACCAC	262	668	202	167	chr11	+	94524595	94524703	108	-31.2	Intron	+	Antisense
607	chr11	-	100494103	100494121	GGGAAGACAGTGCATTATA	3230	2887	11709	16927	chr11	-	100494057	100494169	112	-44.2	Extragenic		N/A
610	chr11	+	111207444	111207464	CCCCTTAGTCTCAGAGGCTAA	28	26	114	32	chr11	-	111207360	111207470	110	-44.62	Extragenic		N/A
612	chr11	-	112070418	112070439	TAACCTTATAGGAGAAACCTGA	154	169	112	135	chr11	+	112070399	112070509	110	-34.9	Intron	+	Antisense
614	chr11	+	113093973	113093992	AGGGGAAGATAGTCTAATGA	33	27	148	47	chr11	+	113093890	113093998	108	-34.8	Intron	+	Sense
619	chr11	+	116528517	116528539	GTTCCCTCGTTCAACCAGCCTCA	66	51	183	23	chr11	-	116528436	116528540	104	-34	Extragenic		N/A
651	chr11	+	134115961	134115980	AGGGGAAGACTCACGATTGG	60	24	165	160	chr11	+	134115915	134116000	85	-33.5	Exon Other	+	Sense
653-1	chr11	-	134826783	134826801	CGCAGCATTTCAGGAATCC	88	192	19	3	chr11	-	134826713	134826810	97	-34	Extragenic		N/A
654	chr12	-	1023175	1023194	CCTCTGACACATTAGCCTTG	53	44	136	99	chr12	+	1023168	1023261	93	-33.3	Exon Other	-	Sense
661	chr12	+	3439176	3439195	TAAAACCTTATTCATCTTGG	75	105	136	183	chr12	+	3439158	3439268	110	-33.5	Extragenic		N/A
679	chr12	-	47808412	47808431	AGCAAACCCAAACAGAACCC	73	143	11	13	chr12	+	47808407	47808498	91	-33.1	Extragenic		N/A
705	chr12	+	56646583	56646602	GAAGACAGGTACGGCCAAGG	10521	12716	18483	18064	chr12	-	56646588	56646690	102	-35.5	Exon Other	-	Antisense
706	chr12	-	56826087	56826109	TTTTCTGCTGTACAGCCAGAATT	247	173	743	610	chr12	-	56826018	56826123	105	-37	Intron	-	Sense
712	chr12	+	63029444	63029464	CCTTCATAGTGCATGCTAAGG	50	218	40	17	chr12	-	63029397	63029495	98	-30.8	Extragenic		N/A
716	chr12	-	66417430	66417449	GATATTCAGAGGCTAGGTGG	767	717	46	18	chr12	-	66417400	66417506	106	-37.2	Extragenic		N/A
718	chr12	-	67804628	67804650	CTCCCTAGTGGGTTATCAGAATC	26	36	168	1734	chr12	-	67804629	67804731	102	-32.3	Extragenic		N/A
721	chr12	-	77260836	77260854	TATTCAGAGGCTATTCCTG	1840	1567	171	119	chr12	+	77260820	77260927	107	-34.3	Intron	-	Sense
724	chr12	+	88265060	88265078	AAGGAATGGAGAGAAGATA	169	97	7	1	chr12	-	88265047	88265156	109	-32.1	Extragenic		N/A
733	chr12	-	106593364	106593382	AATACATTTGGCAGTTTGG	2045	3007	1399	2478	chr12	-	106593352	106593458	106	-34.1	Extragenic		N/A
734	chr12	-	107736292	107736312	AAGGCGAGGCTCCGATAAGAA	595	1459	593	439	chr12	-	107736252	107736364	112	-34.6	Intron	+	Antisense
735	chr12	+	107866550	107866568	GAGGAGCTCACAGGCTAGT	18	17	43	129	chr12	+	107866536	107866641	105	-31.9	Intron	+	Sense
738	chr12	+	109024149	109024167	AACCTTGCACTGAGAATCC	305	409	39	20	chr12	+	109024086	109024191	105	-42.4	Intron	-	Antisense
741	chr12	-	110719244	110719262	TTGAGGCGATCAGAGGCCC	108	199	40	27	chr12	+	110719237	110719298	61	-35.2	Exon Other	+	Antisense
751	chr12	+	115535395	115535413	TTTTCCTCATCACTGCAGC	5	3	93	127	chr12	+	115535380	115535489	109	-35.54	Extragenic		N/A
752	chr12	+	116057049	116057068	TGGAATAAGTGAGGCTCTGT	539	505	29	13	chr12	-	116057022	116057117	95	-31.2	Extragenic		N/A
764	chr12	-	122238151	122238173	GGGGAAGCCTGGGAAAGCGGAGG	146	109	11	11	chr12	-	122238081	122238166	85	-52.6	Intron	-	Sense
777	chr12	+	131812124	131812142	ACAATCTGAGTCAGCAGGA	23	18	126	151	chr12	-	131812044	131812148	104	-33.3	Extragenic		N/A
778	chr12	-	131825750	131825768	CCAGAGCTATTGCTGGTTT	0	0	24	120	chr12	+	131825671	131825782	111	-35.86	Extragenic		N/A
782	chr12	+	132413787	132413806	TTCCGCCTTCGCCCACGTGG	145	120	121	39	chr12	+	132413795	132413878	83	-37.7	Extragenic		N/A
793	chr13	+	27903933	27903952	GGAAGGTAGCATGCCGTGGA	58	49	113	101	chr13	-	27903930	27904036	106	-36.12	Extragenic		N/A
797	chr13	+	28544519	28544538	GGGAAGCGCTGCGGCCAAGG	78	165	128	89	chr13	+	28544502	28544604	102	-47.9	Extragenic		N/A
809	chr13	-	40798109	40798132	ACACATGCATCAGGGGAGAGGTGG	139	32	1	2	chr13	-	40798103	40798184	81	-35.9	Extragenic		N/A
816	chr13	+	65775069	65775087	CTGCTGTAATTAACCTTGA	665	419	1858	1544	chr13	-	65775078	65775187	109	-37.02	Extragenic		N/A
828	chr13	-	96761549	96761569	ATACGATCTGCTGAGTCACAG	120	132	170	167	chr13	+	96761519	96761630	111	-34	Intron	+	Antisense
831	chr13	+	98847892	98847912	GATCCGCTGTGTCAGTAGAGT	64	38	153	106	chr13	+	98847817	98847913	96	-35.9	Intron	+	Sense
832	chr13	-	99237097	99237118	AATTACTGGCTGAGTAATAATT	31	25	111	273	chr13	+	99237028	99237129	101	-30.3	Extragenic		N/A
838	chr13	-	106270934	106270954	AAAACCACCCTCTCCACCTTC	67	122	11	12	chr13	+	106270853	106270956	103	-30.7	Extragenic		N/A
841	chr13	+	108867883	108867901	ATGCCGGTTCCGCCAGCTG	228	187	129	161	chr13	-	108867889	108867979	90	-51.5	Intron	-	Antisense
842	chr13	-	110296482	110296504	TAACTGCTCTGAGAATCCAGTGG	76	107	9	2	chr13	-	110296457	110296536	79	-30.4	Extragenic		N/A
847	chr13	+	113408481	113408499	AAAGGCCTGCGCTGGGGTC	149	216	19	14	chr13	+	113408409	113408505	96	-43.9	Intron	-	Antisense
854	chr14	+	20855924	20855943	ACCTCCGCCTGAGAAAGAGG	188	112	6	3	chr14	-	20855906	20856003	97	-32.7	Intron	-	Antisense
857	chr14	+	22038444	22038464	CAAGGCGCTCAGCTTAGCAGT	12391	12303	7732	3607	chr14	+	22038368	22038463	95	-36.8	Exon 1 of 1	-	Antisense
868	chr14	+	45431649	45431668	CTTCTGCTGCCGCCCTTTCC	12	7	141	53	chr14	-	45431657	45431743	86	-38.5	Exon Other	+	Sense
869	chr14	+	50433117	50433137	AGCATGACAGAGGAGAGGTGG	410	355	29	31	chr14	+	50433118	50433229	111	-41.6	Extragenic		N/A
872	chr14	+	57538886	57538905	TTTCCTCATCAGTGAATTGG	20	11	109	62	chr14	+	57538895	57538970	75	-31.4	Extragenic		N/A
879	chr14	+	65237664	65237683	GGGCCATGCTGAAGAAGCGG	117	136	20	5	chr14	-	65237574	65237685	111	-47.3	Exon Other	-	Antisense
880	chr14	-	66602924	66602944	AGGCTGCAGACTCTGAGCAGT	204	263	70	34	chr14	-	66602898	66603010	112	-40.3	Extragenic		N/A
882	chr14	-	68141486	68141504	GGGTTCCGCGACTGCCGAT	72	226	5	0	chr14	-	68141448	68141514	66	-31	Exon Other	-	Sense
900	chr14	+	93055313	93055331	GAAATAGCAGAGGAGCGGG	103	52	21	19	chr14	-	93055310	93055409	99	-31.8	Intron	+	Sense
903	chr14	-	93577229	93577248	GGCCTTTGCGCTGAGAATGT	101	265	1	0	chr14	-	93577180	93577255	75	-31.26	Intron	-	Sense
918	chr14	-	101192932	101192950	AAGTCGCAGGAATCGAACC	737	905	129	191	chr14	+	101192855	101192962	107	-40.1	Extragenic		N/A
925	chr14	-	101491223	101491243	ATGCAATGTCTGCCGCAGATG	41	30	87	156	chr14	+	101491229	101491331	102	-39.3	Extragenic		N/A
949	chr14	+	103687113	103687134	GGGGAGCTCTGCGCGCGGGAGC	8	9	101	73	chr14	+	103687112	103687195	83	-47.6	Extragenic		N/A
955	chr14	+	105564121	105564140	GAGCTGTAGGGCCAAGGGGC	126	59	104	43	chr14	-	105564097	105564188	91	-43.9	Extragenic		N/A
965	chr15	-	29831676	29831694	AATTGGATATTCAGGGGCT	129	177	3	4	chr15	-	29831658	29831759	101	-35.6	Intron	-	Sense
970	chr15	+	40408351	40408370	TTTTCTCATCACTGCCGGGT	40	31	147	47	chr15	+	40408273	40408382	109	-36.2	Extragenic		N/A
992	chr15	+	62635310	62635328	AAGGGGCTGGGGGAGCACA	26	75	231	325	chr15	+	62635228	62635337	109	-38.1	Extragenic		N/A
993	chr15	-	63128190	63128211	TGAGCCGTGGAAGCGGCGACCT	103	80	10	16	chr15	+	63128192	63128272	80	-39.1	Exon Other	+	Antisense
997	chr15	+	66255512	66255531	AGGAGCGACAGATTCTGGAA	147	101	112	43	chr15	-	66255451	66255533	82	-33.1	Intron	-	Antisense
1002	chr15	-	69357110	69357128	TAACCTTTCCCTGAGAAAG	55	113	2	4	chr15	-	69357113	69357195	82	-31.6	Extragenic		N/A
1007	chr15	-	70368240	70368258	GGGGCCATATCAGAGGGAC	291	359	14	2	chr15	+	70368238	70368348	110	-47.1	Intron	-	Sense	hsa-mir-629
1012	chr15	+	71795905	71795923	TGCAGCATGCTGAGAAAGC	479	708	42	5	chr15	-	71795900	71796007	107	-38.8	Intron	+	Sense
1016	chr15	-	73628460	73628480	GGGGGTGCTCAGAGCCTGGAC	94	159	0	0	chr15	-	73628452	73628534	82	-37.6	Intron	-	Sense
1025	chr15	-	75247787	75247806	TTCCCCTGCTTCAGAGGAGC	100	115	4	1	chr15	-	75247794	75247906	112	-48.4	Exon 1 of 1	-	Sense
1029	chr15	-	79382570	79382593	TGTCGGCCAAGGAGCCGCTGGAGA	158	153	15	9	chr15	+	79382518	79382600	82	-37.1	Exon Other	-	Sense
1031	chr15	+	81062870	81062888	CCGCTGAGTCAGCCAACCT	11	20	71	107	chr15	-	81062790	81062892	102	-45.93	Extragenic		N/A
1034	chr15	-	86289283	86289303	CCCTTCTGGTGTACGGGGCCT	13	7	110	257	chr15	-	86289227	86289309	82	-34.4	Exon Other	+	Antisense
1040	chr15	-	91434970	91434994	CCCTTTCTGCTCAGACGCTGGGTGG	110	15	3	1	chr15	-	91434958	91435040	82	-39.8	Intron	+	Antisense
1043	chr15	-	92634515	92634533	GTTCATGTATGTCGGTGGG	19	132	6	32	chr15	+	92634517	92634629	112	-40.9	Intron	+	Antisense
1059	chr16	-	1209130	1209150	GCCAAGGCGTTCAGAGGCTCT	1869	2585	1680	837	chr16	-	1209112	1209187	75	-31	Intron	+	Antisense
1065	chr16	-	1841836	1841856	CGGCGTTCCGCGGCCTGGGCA	146	156	11	11	chr16	+	1841841	1841919	78	-37.2	Exon Other	-	Sense
1070	chr16	-	2175325	2175343	CGTCCTGTATCAGAGGCTG	37	100	1	0	chr16	+	2175282	2175334	52	-34.5	Intron	-	Sense
1077	chr16	-	3015335	3015357	CAAGGCCCCGCCCATTCGGCCCC	16	153	4	2	chr16	+	3015301	3015375	74	-35.8	Intron	+	Antisense
1078	chr16	-	3271241	3271259	CAATAGTGAGGCTGGGTGG	12	112	0	0	chr16	-	3271217	3271327	110	-40.7	Extragenic		N/A
1086	chr16	-	7345623	7345642	GTCTTGCTGCTTGGTCTGAA	7	6	67	114	chr16	+	7345621	7345720	99	-54.4	Intron	+	Antisense
1099	chr16	+	19125403	19125422	AGGCGCGGAGAGGAGCGGCG	211	116	37	33	chr16	+	19125323	19125432	109	-51.4	Exon Other	+	Sense
1111	chr16	+	30076763	30076783	CCCGTTCCGCCCTCCCCCATT	178	101	43	17	chr16	+	30076770	30076855	85	-39	Intron	+	Sense
1113-1	chr16	+	33347388	33347407	GGTCACTGTACGGCCAAGGT	809	695	1739	2362	chr16	+	33347392	33347502	110	-52.5	Extragenic		N/A
1113-2	chr16	-	33516556	33516575	GGTCACTGTACGGCCAAGGT	809	695	1739	2362	chr16	+	33516461	33516572	111	-47.2	Extragenic		N/A
1124	chr16	-	50324467	50324486	GCCAAGGCCCTGAGCCAGCG	682	709	33	24	chr16	+	50324447	50324555	108	-49.6	Exon Other	+	Antisense
1130	chr16	+	51186589	51186608	GCCTTCCGGGACGAGGTGGC	48	41	343	940	chr16	+	51186595	51186694	99	-47.8	Extragenic		N/A
1131	chr16	-	54574901	54574919	TTGCTCAGAGGCTGGACAG	622	1244	4	3	chr16	+	54574813	54574919	106	-42.6	Extragenic		N/A
1140	chr16	+	57093170	57093191	GGGGACCATGGAGGCCATGGGG	226	240	343	1153	chr16	+	57093169	57093269	100	-46.7	Intron	+	Sense
1143	chr16	+	58535061	58535080	TGCCGGTTCCGCAGACGATA	405	262	47	34	chr16	+	58535054	58535135	81	-31.5	Intron	+	Sense
1156	chr16	+	67701958	67701976	GGCCAGCATGGTGTCTGCA	35	66	91	122	chr16	-	67701966	67702054	88	-31.2	Exon Other	+	Sense
1158	chr16	-	68315627	68315648	CCCTTCTGCAGTCAAATCAAGT	190	135	21	19	chr16	+	68315637	68315726	89	-34.5	Intron	+	Antisense
1163	chr16	-	71459815	71459835	GGCTGGAGCGTGCGACCTCAG	50	58	81	269	chr16	-	71459725	71459833	108	-44	Extragenic		N/A
1165	chr16	-	72128109	72128128	GGCCAAGGCGGCCAGGACGG	154	113	34	32	chr16	+	72128102	72128194	92	-31.7	Exon Other	-	Sense
1167	chr16	-	73114144	73114162	GAACCGCTGTCTTAGAGGT	94	119	12	4	chr16	-	73114122	73114229	107	-37.8	Extragenic		N/A
1175	chr16	-	80310553	80310572	TTTAGTTGAATCCTGTAGTG	41	48	123	703	chr16	+	80310554	80310665	111	-32.4	Extragenic		N/A
1187	chr16	+	86968590	86968610	CAAGGCTATCAGAGGCTGCTC	1840	2203	119	106	chr16	+	86968534	86968626	92	-33.4	Extragenic		N/A
1195	chr16	+	89598384	89598407	GGGAAGACGCTGCTGGCCAAGGCG	118	46	125	70	chr16	+	89598388	89598459	71	-34.7	Exon Other	+	Sense
1199	chr17	+	1202351	1202371	CTTCTGCTGTAGCCTGGGACC	12	9	90	102	chr17	+	1202336	1202411	75	-34.4	Exon Other	+	Sense
1216	chr17	-	5504751	5504769	CCAAGGCGCAGAGAGGGAC	110	43	7	4	chr17	+	5504684	5504773	89	-32.6	Extragenic		N/A
1246	chr17	+	17067886	17067907	AGGAGCGCATTGCCGACCTCAG	248	174	6	0	chr17	-	17067810	17067922	112	-47.5	Intron	+	Sense
1253	chr17	-	19237803	19237823	CCAAGGCCTCAGAGGAGCCCT	163	222	12	10	chr17	-	19237776	19237875	99	-44.5	Exon Other	+	Antisense
1259	chr17	-	26906526	26906544	GGCTGGAAGGCTAGACCTC	78	130	7	23	chr17	-	26906466	26906547	81	-33.7	Intron	-	Sense
1267	chr17	-	30818790	30818811	TGCCGCAATTATGGGCTGGAGT	26	107	0	0	chr17	-	30818768	30818867	99	-41.2	Extragenic		N/A
1271	chr17	-	31347201	31347220	ATCACTATGCCAGGGACCCA	9	15	62	153	chr17	-	31347148	31347258	110	-34.9	Intron	-	Sense
1274	chr17	+	36060735	36060753	TCCCCTTCATCTGTAGGCC	9	7	336	297	chr17	-	36060742	36060821	79	-33.1	Intron	-	Antisense
1280	chr17	-	38249574	38249593	CGGTTCCTCCTCAGAGGAG0	132	452	22	18	chr17	-	38249574	38249648	74	-31.8	Exon Other	+	Antisense
1293	chr17	+	43301576	43301597	TAAGGACACTTGGCTAAGACCC	126	121	196	204	chr17	-	43301584	43301653	69	-36.3	Intron	+	Sense
1313	chr17	+	53343498	53343516	GGTAGCTGAGAAAGCGGGG	217	174	111	49	chr17	+	53343488	53343594	106	-46.2	Intron	+	Sense
1316	chr17	+	56770053	56770072	TTCCCGCTGTCTCCAGCGGT	259	225	138	119	chr17	+	56770006	56770091	85	-34.3	Exon Other	+	Sense
1317	chr17	-	57547526	57547544	CCATAGACAGAATCAAGTG	170	622	1	1	chr17	-	57547516	57547599	83	-30.8	Extragenic		N/A
1322	chr17	+	62776914	62776932	TCTAGTGCGGGCGTTCCCG	13	4	134	60	chr17	+	62776877	62776942	65	-36.2	Exon Other	-	Antisense
1363	chr17	-	78660596	78660618	TGAAGCGCAGGTGCTCAGGACTC	33	39	81	132	chr17	+	78660518	78660620	102	-32.9	Intron	+	Antisense
1369	chr17	+	79544149	79544169	GGTTCCTCAGAGATACCCTCT	72	47	146	145	chr17	+	79544133	79544217	84	-36.6	Intron	-	Antisense
1375	chr17	-	80361977	80361995	TGCGCTGACGGCTATTGTG	133	131	47	7	chr17	-	80361899	80362004	105	-48.2	Intron	-	Sense
1390	chr18	+	13421558	13421578	GGTTCCCTGAGTCTCCCTAGG	58	219	4	5	chr18	+	13421534	13421590	56	-33.8	Intron	+	Sense
653-2	chr18	+	14964332	14964350	CGCAGCATTTCAGGAATCC	88	192	19	3	chr18	-	14964297	14964405	108	-35.6	Extragenic		N/A
1393	chr18	-	19931091	19931109	CGACACGTGCCAGGGAGCA	38	38	65	100	chr18	+	19931085	19931177	92	-35.1	Extragenic		N/A
1409	chr18	-	37370390	37370411	GCTAGTGAAGTAACTTTCAGGA	223	375	242	412	chr18	-	37370296	37370407	111	-50.1	Intron	-	Sense
1412	chr18	-	43933615	43933633	GCAGCATGCGTCTCCAGGG	187	80	12	9	chr18	+	43933619	43933710	91	-42.5	Intron	+	Antisense
1417	chr18	+	47364085	47364106	TCTGCCATGCTGGAGGAGCGCT	3270	1512	71	48	chr18	-	47364073	47364181	108	-47.5	Exon Other	-	Antisense
1431	chr18	+	60784699	60784717	AAAGGAGTCTGTAATTAAA	58	27	397	598	chr18	+	60784704	60784796	92	-30.3	Extragenic		N/A
1439	chr18	-	73111843	73111861	TCCTCATGTGCATTACAA	185	87	226	239	chr18	+	73111843	73111947	104	-35.3	Extragenic		N/A
1441	chr18	+	73727714	73727734	CTTCTCTAGAGACTCTTAGCG	26	122	6	5	chr18	-	73727614	73727725	111	-38.4	Extragenic		N/A
1442	chr18	+	76336689	76336711	TTGATGCAGTCTCTGCCTCCTGC	3	13	45	125	chr18	-	76336595	76336701	106	-46.8	Extragenic		N/A
1465	chr19	+	3577011	3577029	GCGCTGGAGGAGCGGAGG	195	167	6	1	chr19	+	3577011	3577091	80	-38.7	Exon Other	+	Sense
1474	chr19	-	5708125	5708146	CCCCTTCTGCTGAGGCCGGAAG	49	14	247	202	chr19	-	5708076	5708161	85	-35.2	Intron	-	Sense
1488	chr19	-	10265382	10265401	TCCCTCCTGCGACACGCGCA	130	141	27	11	chr19	-	10265340	10265417	77	-37.3	Exon Other	-	Sense
1494	chr19	-	11347999	11348017	AGGGCCCCCGTGTAGCTCA	37	52	104	133	chr19	+	11348001	11348109	108	-40.84	Intron	-	Sense
1503	chr19	-	14038924	14038942	AACCTGCTTCAGAGGAGAG	107	75	0	2	chr19	+	14038921	14039001	80	-31.7	Intron	+	Antisense
1507	chr19	-	15774882	15774902	AATCAGGGGCCATGGAGGTGG	52	50	86	103	chr19	-	15774809	15774897	88	-46.9	Extragenic		N/A
1514	chr19	+	18119061	18119081	TGCCGGTTCGCGAGTTCGAGG	142	85	19	4	chr19	+	18119037	18119138	101	-38	Intron	+	Sense
1521	chr19	-	19574153	19574172	CCTTCCTCCGACATGCCTTG	9	6	141	233	chr19	-	19574161	19574273	112	-43.3	Intron	+	Antisense
1524	chr19	+	28558245	28558264	GCCAAGGAGTCCCTGGATGG	37	46	35	151	chr19	-	28558180	28558260	80	-44.1	Extragenic		N/A
1533	chr19	-	31748624	31748642	AGGCCCAGGGACAAGCCCC	79	145	72	113	chr19	+	31748552	31748664	112	-44.5	Extragenic		N/A
1539	chr19	+	33355760	33355780	GTACGGCCAGGGCGGCCCCAG	272	403	484	1018	chr19	-	33355756	33355833	77	-44.2	Intron	-	Antisense
1551	chr19	+	38040081	38040100	GGGCGCTCTCTTTCCGGAGG	166	185	22	7	chr19	+	38040015	38040110	95	-39.6	Intron	+	Sense
1553	chr19	-	38810611	38810630	ACGCGGCCAAGGCGCCCGCC	125	176	59	193	chr19	+	38810615	38810684	69	-38.1	Exon Other	+	Antisense
1557	chr19	+	40182479	40182502	CCTCACTCCATCATCCTTGTCTGT	11	9	94	151	chr19	-	40182411	40182505	94	-41.7	Extragenic		N/A
1572	chr19	-	49528969	49528988	AGGTGCCTGCAGCTGTCGGC	45	104	120	210	chr19	-	49528868	49528980	112	-57.3	Intron	-	Sense
1578	chr19	+	50658033	50658052	TAGCCCCATACCCACCCCAC	678	746	32	44	chr19	-	50657961	50658055	94	-45.8	Intron	-	Antisense
1584	chr19	-	51815201	51815220	GGCGTCCCGGCCGAGCCCCC	180	211	59	29	chr19	+	51815147	51815236	89	-48	Intron	+	Antisense
1588	chr19	-	53606213	53606231	TCCGCCTGGTCCTGGGATC	799	543	98	15	chr19	+	53606196	53606274	78	-43.6	Intron	-	Sense
1591	chr19	-	54525530	54525548	TCCGCGAGGAGCTGAGCAC	395	369	136	154	chr19	-	54525461	54525543	82	-30.9	Extragenic		N/A
1594	chr19	+	56828692	56828712	ACCAGCATGCTGAAGGTCAGG	170	150	4	3	chr19	+	56828630	56828714	84	-33.1	Intron	-	Antisense
1595	chr19	+	57387174	57387192	GGGAGTAGGTGCGGCAAGG	101	123	43	41	chr19	-	57387152	57387242	90	-33.4	Extragenic		N/A
1602	chr2	-	3911481	3911502	AAATTGCAGCAGAGGCTGTTTT	211	131	11	3	chr2	+	3911485	3911560	75	-30.7	Extragenic		N/A
1608	chr2	+	8654866	8654887	CCTCCTTCCCTTCATGGAGGCT	30	89	537	238	chr2	+	8654865	8654960	95	-31.4	Extragenic		N/A
1612	chr2	-	11665757	11665775	CACCAAGAGTGGTAGAAT0	36	82	911	456	chr2	-	11665757	11665845	88	-34.1	Extragenic		N/A
1614	chr2	+	16170565	16170583	ACATTAACTCCCGGGCCAA	108	97	5	5	chr2	-	16170571	16170624	53	-32.6	Extragenic		N/A
1629	chr2	-	26667478	26667499	AAAAGGAGCTGTGCTAATTCCT	18	15	179	115	chr2	+	26667468	26667561	93	-32.7	Intron	+	Antisense
1646	chr2	+	36764544	36764562	TGCCGACGAGGAGCGGTGG	104	137	13	13	chr2	-	36764526	36764612	86	-37.4	Exon Other	+	Sense
1649	chr2	+	39963815	39963835	AAACTTCTGCTGTACAGCTAA	428	309	318	113	chr2	-	39963799	39963887	88	-32.8	Exon Other	-	Antisense
1652	chr2	-	43451928	43451947	TCTGCTGTACGGCACCGGGG	42	26	236	147	chr2	-	43451920	43451993	73	-44	Exon Other	-	Sense
1653	chr2	-	45155812	45155833	CCTTCGCAGTCTCCCTAGGCTG	84	79	138	73	chr2	-	45155765	45155860	95	-41.5	Extragenic		N/A
1657	chr2	-	48757417	48757439	TTTCCCAGACACGGCGGGAGGCC	129	28	28	16	chr2	+	48757377	48757436	59	-32.9	Intron	+	Antisense
1661	chr2	+	56396892	56396911	TTGGAATTTCAGAGCGACAG	164	65	0	2	chr2	+	56396825	56396928	103	-30.5	Intron	+	Sense
1666	chr2	-	65882228	65882249	AACAGGATGCTGTACGCCAAGG	308	146	139	163	chr2	+	65882223	65882333	110	-33.8	Intron	+	Antisense
1670	chr2	+	71228349	71228369	AGGAGGCGGTACGGCCGGAAG	202	273	2044	1393	chr2	+	71228316	71228413	97	-50.1	Extragenic		N/A
1672	chr2	-	71937961	71937980	AAGAGACTGAGTCTCCGATG	56	145	7	3	chr2	-	71937950	71938060	110	-32.1	Extragenic		N/A
1678	chr2	-	74511720	74511738	GGAAGACAGACTGCCGATA	105	33	50	22	chr2	+	74511683	74511787	104	-32.4	Intron	-	Sense
1679	chr2	+	74689521	74689543	GGAGGGATCCCACCGCTGAACCA	12	14	95	136	chr2	-	74689503	74689577	74	-37.3	Exon Other	-	Antisense
1682	chr2	-	77591747	77591767	AGGCAAACTGACAGGAGATGG	100	85	1	1	chr2	-	77591737	77591841	104	-30.4	Intron	-	Sense
1687	chr2	-	85578979	85578999	CCCTTCTGCTGTAGCTTTTTC	4	3	74	114	chr2	-	85578921	85579020	99	-32.2	Intron	-	Sense
1688	chr2	-	85788520	85788540	TGCCGGGTCCGCGCGGACCTC	3197	2098	203	173	chr2	-	85788429	85788536	107	-54	Exon Other	-	Sense
1691	chr2	-	86010780	86010798	TTCTGCTGCCGGCCAAGGC	2837	1625	2145	2020	chr2	+	86010723	86010800	77	-35.2	Intron	+	Antisense
1700	chr2	+	105550871	105550891	GGCCAAGCCCCTGCTCCACCG	282	415	480	570	chr2	-	105550853	105550962	109	-41.7	Extragenic		N/A
1705	chr2	+	110274120	110274139	CAAGGCGGCTGTGAGGGCCG	96	120	754	262	chr2	-	110274068	110274143	75	-38.3	Extragenic		N/A
1718	chr2	+	121856531	121856550	TCTATTCAGAGGCTTTCTGG	112	90	7	1	chr2	+	121856484	121856565	81	-42.6	Extragenic		N/A
1722	chr2	-	122965179	122965198	GGGGAAGACAGTGCATGAAA	16	10	168	229	chr2	+	122965123	122965211	88	-35.8	Extragenic		N/A
1733	chr2	+	129626007	129626029	GGCCAAGGTAAGTCTCAGACGGA	156	179	5	5	chr2	+	129626001	129626109	108	-32.6	Exon Other	+	Sense
1741	chr2	+	136553825	136553846	CCTTTCTGCTACCATTAACCTG	58	33	275	196	chr2	-	136553798	136553910	112	-30.4	Intron	-	Antisense
1744	chr2	+	139322969	139322989	GCCAGGTACCTTGAGTAATAT	32	26	59	134	chr2	+	139322883	139322992	109	-30.6	Intron	+	Sense
1749	chr2	+	150242520	150242539	CCCCAAGACCTGTAATTAAC	29	25	155	306	chr2	-	150242428	150242540	112	-37.3	Intron	+	Sense
1752	chr2	+	159921490	159921508	TTCCCTTAGTGCATTAATA	11	5	117	122	chr2	+	159921488	159921595	107	-44.7	Intron	+	Sense
1753	chr2	-	159992224	159992242	TACAAACAGCCGGCCTGTA	110	151	83	115	chr2	+	159992133	159992236	103	-45.9	Intron	+	Antisense
1763	chr2	-	178420628	178420646	GAGCAGCATCACGTGAAAT	99	82	77	135	chr2	+	178420567	178420654	87	-34.2	Extragenic		N/A
1769	chr2	+	193692139	193692158	TTCTATCACAATTAACCTTC	55	29	178	133	chr2	+	193692146	193692257	111	-34	Extragenic		N/A
1777	chr2	+	208692507	208692529	CCACGGACACCAGGTCCTGGAAG	7	9	103	262	chr2	-	208692452	208692523	71	-30.52	Exon Other	-	Antisense
1778	chr2	+	211035805	211035824	CGCTGCCGCCGTCCCCAAGA	84	54	222	157	chr2	-	211035801	211035871	70	-35.7	Intron	-	Antisense
1779	chr2	+	214850530	214850551	GGAAATAGCAGAGGCTATTGAA	217	205	34	21	chr2	-	214850534	214850627	93	-34.9	Intron	+	Sense
1786	chr2	-	218993605	218993624	AAAGGGAGCAGTGCATTAAA	22	15	237	121	chr2	+	218993583	218993687	104	-31	Intron	+	Antisense
1787	chr2	-	219264312	219264333	CGGCCAAGGCCCGCCCGCCGGG	154	110	27	24	chr2	+	219264316	219264391	75	-44.1	Extragenic		N/A
1789	chr2	+	219862285	219862303	GGCAAAGGCCCTGAGAATC	554	589	37	8	chr2	-	219862258	219862370	112	-44.4	Extragenic		N/A
1796	chr2	+	221641798	221641816	TGGAATAAACAGCATGTG	178	142	52	72	chr2	+	221641798	221641902	104	-38.4	Extragenic		N/A
1798	chr2	-	223989097	223989115	GTCCTGAGGGCCACACCCA	4	12	57	117	chr2	+	223989035	223989145	110	-40.5	Extragenic		N/A
1801	chr2	+	225172441	225172460	CTGTAGTGCATTAAGGAGAG	91	75	177	170	chr2	+	225172344	225172452	108	-31.5	Extragenic		N/A
1803	chr2	-	229107281	229107299	ATTGGAATGGGAGTGGTGG	423	265	79	21	chr2	-	229107257	229107366	109	-36.6	Extragenic		N/A
1818	chr2	+	237051690	237051712	CCAAGGTCCTGAGAATCTCCACC	1041	863	26	27	chr2	-	237051619	237051710	91	-32	Extragenic		N/A
1844	chr20	-	2083366	2083385	CAGGCCAAGGCGGGGAGGCC	232	205	119	176	chr20	+	2083316	2083392	76	-47.8	Intron	+	Antisense
1846	chr20	+	2489498	2489517	GGCCAAGGAGCCGCGGAGGC	123	225	34	73	chr20	+	2489480	2489552	72	-35.9	Intron	-	Antisense
1866	chr20	+	23013166	23013184	CTCATCACTGGGCTGGAAG	127	94	20	12	chr20	+	23013161	23013241	80	-33.3	Extragenic		N/A
1867	chr20	+	23030390	23030408	GGGAAGGGCTGATGCCGCA	22	15	137	95	chr20	+	23030380	23030458	78	-36.2	Extragenic		N/A
1870	chr20	-	24351168	24351187	GACAGCCACCAGGGATTCCC	13	20	49	169	chr20	-	24351105	24351211	106	-53.4	Extragenic		N/A
1872	chr20	+	25039269	25039287	GTTCCGCATCTCAGAGGCT	260	309	49	12	chr20	+	25039251	25039348	97	-36	Exon Other	-	Antisense
1892	chr20	+	40022046	40022065	GCACGTGTGTGCTGGGTTTC	50	198	184	316	chr20	+	40022002	40022072	70	-31.1	Extragenic		N/A
1896	chr20	+	42213591	42213609	GGGGCCTCAAGTGCATTCC	18	4	89	168	chr20	+	42213583	42213693	110	-40.5	Exon Other	+	Sense
1898	chr20	+	43238806	43238827	CCATCTGCTGTAGCCGGGGGGA	22	6	199	176	chr20	+	43238746	43238856	110	-49.6	Intron	+	Sense
1902	chr20	+	46636221	46636239	TTCTGCTCAGATTAGTTTT	331	92	39	4	chr20	+	46636225	46636310	85	-30.3	Extragenic		N/A
1907	chr20	-	48500575	48500593	GTCTTGCTGAGGTTGACGT	21	27	142	203	chr20	-	48500487	48500593	106	-42.1	Exon Other	+	Antisense
1908	chr20	+	49284166	49284186	AGCTCACTGTACGGCCCCTGC	18	19	261	327	chr20	+	49284091	49284190	99	-31.6	Intron	-	Antisense
1910	chr20	+	54549772	54549794	CCCCTTCACACATGCCCCAAGGC	136	92	129	123	chr20	-	54549762	54549837	75	-33.9	Extragenic		N/A
1917	chr20	-	57917599	57917618	AAAGGAGCGACATGGGCCCA	134	80	875	712	chr20	+	57917595	57917674	79	-36.1	Extragenic		N/A
1920	chr20	+	59053936	59053954	AAAAGGAATTTCAGAGGCT	264	406	8	6	chr20	-	59053864	59053961	97	-33.4	Intron	+	Sense
1924	chr20	-	59815749	59815767	GCCGGGGAGCTCAGAGGCT	146	163	108	42	chr20	+	59815662	59815766	104	-45	Extragenic		N/A
1937	chr20	+	62685313	62685332	CTGCTGTGCGGCCTTCCCAG	130	51	17	13	chr20	+	62685288	62685396	108	-44.2	Extragenic		N/A
1948	chr21	+	36830855	36830873	ACTGTTGCTCCGGAGTGAC	8	13	32	117	chr21	+	36830847	36830948	101	-31.6	Intron	-	Antisense
1954	chr21	+	40021198	40021218	CAGCTGAGAGCCACACCCATG	25	10	108	92	chr21	+	40021149	40021211	62	-34.4	Intron	-	Antisense
1958	chr21	+	43111456	43111474	GTTTTGCTCCAATCAAGGG	344	346	601	894	chr21	-	43111461	43111555	94	-35.3	Intron	+	Sense
1959	chr21	+	43291975	43291993	TCCTGTAGCATGCCGGCCT	205	329	405	285	chr21	+	43291917	43291995	78	-34.6	Intron	-	Antisense
1966	chr21	-	45029834	45029852	CCGGTTCCAGTCCCTGGAG	62	152	27	68	chr21	-	45029768	45029870	102	-38.5	Intron	-	Sense
1974	chr21	-	46182314	46182333	GGCCAAGGTCCACTCTTAGC	104	110	7	13	chr21	+	46182301	46182408	107	-32.5	Extragenic		N/A
1975	chr21	+	46281526	46281546	TGCCGGTTCTGCCTGGAGCAC	170	215	108	373	chr21	-	46281518	46281607	89	-34.3	Intron	-	Antisense
1978	chr21	+	46713363	46713384	CCAAGGAGGACTCTTCTAGGAG	611	557	21	19	chr21	+	46713351	46713463	112	-37	Exon Other	+	Sense
1997	chr22	-	22278033	22278053	GGGGGAGCTCACAGGCCAAGG	6	8	299	254	chr22	-	22277948	22278047	99	-38.7	Intron	-	Sense
2008	chr22	+	27693895	27693913	GGGGAAGTGCTGCTAATTG	120	60	224	204	chr22	-	27693833	27693912	79	-31.22	Extragenic		N/A
2009	chr22	+	29099666	29099684	GCCCCCTGCCTCAGAGGCT	85	170	5	1	chr22	-	29099619	29099692	73	-31.9	Intron	-	Antisense
2011	chr22	+	29999689	29999707	AGGCGTCCCCGGCATCTCC	1688	1769	1841	1346	chr22	-	29999671	29999759	88	-45.5	Exon Other	+	Sense
2015	chr22	-	32605338	32605356	TTTTGGAAGCCTGAGAACT	60	101	9	1	chr22	-	32605321	32605415	94	-33.4	Extragenic		N/A
2017	chr22	+	33211207	33211226	CCAAGGCTCAGAGGCTACTG	291	550	167	140	chr22	+	33211174	33211286	112	-50.3	Intron	+	Sense
2018	chr22	-	34261009	34261027	TCTGCTGGGCTGGGCCTGA	0	0	5	113	chr22	+	34260933	34261034	101	-43.8	Intron	-	Sense
2019	chr22	-	35732761	35732781	GGGCTAGGGCCTGCTGCCCCC	251	207	46	56	chr22	-	35732714	35732792	78	-45.3	Intron	+	Antisense
2021	chr22	+	36581759	36581778	GTTCCATGTCAGAGGCTGGG	71	140	3	6	chr22	-	36581709	36581785	76	-31.9	Extragenic		N/A
2031	chr22	+	38215209	38215227	TCATATCAGCTTAGCCTTG	114	296	1	1	chr22	+	38215208	38215312	104	-46	Extragenic		N/A
2034	chr22	-	39240757	39240775	CCCCAAGGATTCAGAGGAG	365	503	13	16	chr22	+	39240669	39240778	109	-35.9	Extragenic		N/A
2037	chr22	-	39957623	39957641	GCTGGGACAGAGCTTAGGC	22	25	77	137	chr22	+	39957572	39957659	87	-44	Extragenic		N/A
2038	chr22	-	40065011	40065030	GCCAAGGCTGAGTCTCCTCC	85	161	5	5	chr22	+	40065018	40065078	60	-33	Intron	+	Antisense
2053	chr22	+	45241252	45241272	CGTGAGGGCTGCTGGGTGCAC	180	241	318	436	chr22	+	45241259	45241335	76	-32.6	Intron	+	Sense
2068	chr22	-	48493452	48493471	GGAAGCCATGAGTCTCCGGT	203	351	226	95	chr22	-	48493429	48493533	104	-44.6	Extragenic		N/A
2073	chr22	+	49400426	49400446	CGCCATGCTGAGGGCTCCGTG	229	122	6	3	chr22	+	49400428	49400495	67	-35.8	Extragenic		N/A
2078	chr3	-	10285702	10285722	AGCTACATCACACATCAAGCC	41	45	113	159	chr3	+	10285616	10285724	108	-41.6	Extragenic		N/A
2083	chr3	-	11600447	11600465	CCCAAGTGCCTGACTTAGC	34	115	3	0	chr3	+	11600383	11600468	85	-43.2	Intron	-	Sense
2087	chr3	+	13141985	13142006	TTCAGCATGGACCAACTTCCTG	39	125	35	5	chr3	-	13141983	13142083	100	-37.3	Extragenic		N/A
2091	chr3	+	13414259	13414277	CCCTTACAGCATGCTGGGT	96	116	1	0	chr3	-	13414193	13414294	101	-44.5	Intron	-	Antisense
2100	chr3	-	24164641	24164662	CCCCTTCCATCTCTGAATCAA	218	363	23	10	chr3	+	24164641	24164750	109	-41.3	Intron	-	Sense
2104	chr3	+	31173455	31173477	TGTGTAATGTTCCATTCTGGGGG	113	151	1	1	chr3	+	31173427	31173539	112	-35.5	Extragenic		N/A
2116	chr3	+	42226694	42226715	GGGGTTCCTGAGTCAGGCTGGG	33	129	4	4	chr3	+	42226631	42226743	112	-46.1	Intron	+	Sense
2121	chr3	-	45379489	45379508	GCGTTCCCTATCAGAAAAGC	147	211	8	10	chr3	+	45379474	45379570	96	-40	Extragenic		N/A
2124	chr3	-	46635078	46635099	GAAGCGCAGAGACTCCTAGCGG	125	78	7	2	chr3	-	46635028	46635118	90	-38	Extragenic		N/A
2126	chr3	-	46798319	46798338	TCCGCAGGGGCCGTGGAGGC	83	62	117	79	chr3	+	46798322	46798416	94	-55	Intron	-	Sense
2134	chr3	+	49674330	49674348	CCCTTCTGCACATCGGCCT	2149	933	2467	1300	chr3	+	49674236	49674342	106	-37.6	Intron	+	Sense
2135	chr3	-	50361978	50361998	TGGAATATCTGTCTTAGCTGT	18248	25024	9315	4584	chr3	-	50361890	50361993	103	-39.6	Extragenic		N/A
2136	chr3	+	50423233	50423251	GTTCCGCTCAGAGGAGGGG	320	180	7	20	chr3	+	50423175	50423248	73	-33.3	Intron	-	Antisense
2139	chr3	+	50536463	50536484	AAGGGAGATCACCATTAGCCTG	39	25	231	133	chr3	-	50536419	50536513	94	-33	Intron	-	Antisense
2151	chr3	+	54597126	54597146	TCCAGATGGGCACGCACACAC	2	3	69	113	chr3	+	54597087	54597196	109	-31.7	Intron	+	Sense
2153	chr3	-	56716522	56716544	TTGGTGCGAGAGAAAGCGGTGGA	133	144	36	19	chr3	-	56716469	56716568	99	-37.5	Intron	-	Sense
2157	chr3	+	62304706	62304724	CCGGAAGGGCTCAGAGGCG	44	100	29	15	chr3	+	62304700	62304809	109	-55.2	Extragenic		N/A
2159	chr3	+	64945333	64945355	ACAATTGGAATATCAGACCTCAC	368	109	10	8	chr3	-	64945274	64945360	86	-33.8	Intron	+	Sense
2166	chr3	+	111990904	111990926	CCAAGGCCATCAGAGGCTCTTTG	561	538	198	110	chr3	-	111990897	111990961	64	-30.3	Intron	-	Antisense
2172	chr3	+	121779279	121779297	TGGAAATAATCTGGAGTCA	89	108	32	36	chr3	-	121779286	121779381	95	-35.7	Intron	+	Sense
2177	chr3	+	124093255	124093274	CTTATATCAGAGGCTGTGGG	988	896	841	399	chr3	+	124093179	124093284	105	-33	Intron	+	Sense
2178	chr3	-	124245604	124245626	ATTTCTATAGTCTCTGATAGTGG	56	115	5	0	chr3	-	124245585	124245674	89	-33.5	Intron	+	Antisense
2179	chr3	+	124495015	124495035	GGTTCCATAGCAGAGGCTGGG	90	264	7	9	chr3	+	124494943	124495035	92	-35.5	Intron	-	Antisense
2189	chr3	+	128000724	128000747	GGCGTTCCCCTGAGTTAGTGGTGG	277	233	17	14	chr3	+	128000710	128000820	110	-36.6	Intron	+	Sense
2199	chr3	-	133870373	133870391	TCCAGTCAGCTTGGTGTTT	3	5	41	207	chr3	-	133870292	133870400	108	-30.8	Extragenic		N/A
2205	chr3	-	137744695	137744715	GGGCAAGGGCAATGACCCCAG	58	125	3	5	chr3	-	137744694	137744805	111	-34.5	Intron	+	Antisense
2214	chr3	-	149314193	149314211	AGCTGTGGTGCCAGGGCTT	11	14	49	167	chr3	-	149314197	149314302	105	-35.2	Intron	-	Sense
2226	chr3	-	163733272	163733291	TTATGCAGACCTTGATCCTG	219	109	3138	267	chr3	+	163733275	163733382	107	-30.9	Extragenic		N/A
2238	chr3	+	184209226	184209244	CGCGCTCCTCCCTCGGGCG	101	72	3	0	chr3	+	184209209	184209301	92	-50.9	Extragenic		N/A
2246	chr3	+	193968688	193968712	GCCAAGACATCTGAGAAGCGGGTGG	80	146	36	12	chr3	-	193968614	193968714	100	-36.8	Extragenic		N/A
2251	chr3	+	195516860	195516879	TTGGAATAGTGCCAGCTGTC	1273	1033	212	60	chr3	+	195516795	195516888	93	-32.3	Exon Other	-	Antisense
2262	chr4	+	1219334	1219354	GCACGTTGCAGACGGCAATGC	22	69	118	443	chr4	+	1219254	1219345	91	-38.4	Exon Other	-	Antisense
2266	chr4	+	2427771	2427789	GGACGCTCAGAGGCTGTTT	458	533	85	18	chr4	-	2427708	2427784	76	-30.7	Extragenic		N/A
2280	chr4	-	7489069	7489089	CCCCTTCTGCTGTAGGATGGG	18	5	50	108	chr4	-	7489066	7489165	99	-44	Intron	+	Antisense
2316	chr4	-	84274317	84274335	GTGATGCATGTCAGGAGTG	179	52	0	5	chr4	+	84274241	84274335	94	-36.8	Extragenic		N/A
2318	chr4	-	86025052	86025072	AAGATAGACTCTTAGCCTATG	638	613	41	10	chr4	+	86025043	86025141	98	-53.5	Extragenic		N/A
2320	chr4	+	100201136	100201156	CCTTCTGCCTGCATTAGTTCC	3599	2283	528	297	chr4	+	100201107	100201219	112	-30.3	Intron	-	Antisense
2321	chr4	+	100575087	100575105	GTCTTGCTGCTGGGTTCAT	28	25	82	103	chr4	+	100575058	100575163	105	-49.8	Extragenic		N/A
2336	chr4	-	156823360	156823382	ACCTTACCTGAGAGAGCGGTGGA	3298	5329	570	270	chr4	-	156823306	156823412	106	-32	Extragenic		N/A
2338	chr4	+	160943803	160943821	AATTCCTCATCTGCATTAC	157	41	215	174	chr4	-	160943780	160943880	100	-32.3	Extragenic		N/A
2339	chr4	+	172107340	172107358	GAATACGTCTGGTTGATCC	17178	9331	63537	4485	chr4	+	172107335	172107443	108	-33.7	Extragenic		N/A
2345	chr4	+	182273081	182273100	GTCGTCAATGTCTGCTATCA	57	41	204	584	chr4	+	182273022	182273121	99	-34.3	Extragenic		N/A
2354	chr4	-	186668823	186668842	GGAGTAGTGCAGGCTGGGGG	202	57	75	46	chr4	+	186668762	186668858	96	-35.9	Intron	-	Sense
2358	chr5	+	843229	843248	GCATCGGTTCCCGAGGCCCA	105	42	6	10	chr5	-	843231	843304	73	-36.8	Intron	-	Antisense
2360	chr5	-	1001975	1001994	GGAAGAATCTGCATGCCTTC	5	1	149	65	chr5	-	1001957	1002046	89	-34	Extragenic		N/A
2366	chr5	-	1510882	1510902	ACGGCCCAGGCGGCATTGGTG	609	935	614	929	chr5	-	1510877	1510971	94	-36.9	Intron	-	Sense
2368	chr5	-	1808231	1808250	GAGCTCCACCTCTGCCACCA	0	0	47	124	chr5	+	1808170	1808277	107	-42.3	Intron	+	Antisense
2373	chr5	-	3693699	3693717	CCACTGCTCGTGCTCTCCC	171	175	352	208	chr5	+	3693610	3693719	109	-32.4	Extragenic		N/A
2375	chr5	+	5140076	5140097	AGGTCCATGCTGAGCATCGCCC	156	194	7	2	chr5	-	5140060	5140171	111	-58.2	Extragenic		N/A
2377	chr5	+	6481698	6481716	AGCCAACCCAAACAGAACT	63	122	7	6	chr5	-	6481680	6481768	88	-36.9	Intron	+	Sense
2381	chr5	-	8854725	8854745	AAATGGAATACATAGTTCTGA	1396	1500	197	249	chr5	-	8854717	8854816	99	-39.8	Intron	+	Antisense
2396	chr5	+	45725578	45725600	TCTCTTCCCTATTCTGATGCTGG	76	133	64	115	chr5	+	45725584	45725694	110	-35.6	Extragenic		N/A
2403	chr5	-	71360832	71360853	CAAGGCGGCTTTTCCTAGCCCC	154	175	27	21	chr5	-	71360743	71360847	104	-46.4	Extragenic		N/A
2406	chr5	-	73186469	73186489	TTGGCCATATCAGAGGCTGTG	395	694	15	5	chr5	+	73186369	73186481	112	-39.3	Intron	+	Antisense
2411	chr5	+	75626175	75626193	AGGGGAAGAGCTGAGCCGA	76	57	101	35	chr5	+	75626110	75626221	111	-39.7	Extragenic		N/A
2420	chr5	-	80065443	80065461	AGGAGTAGCATGCCTCAAG	68	22	79	137	chr5	+	80065362	80065458	96	-32.3	Intron	+	Antisense
2425	chr5	-	95768023	95768044	ATTGGAAGAGTGCCAGCTGCT	172	150	7	3	chr5	+	95768023	95768097	74	-31.6	Intron	-	Sense
2428	chr5	-	105790473	105790493	AAAACAGTGCATTAACCTTTC	456	484	650	971	chr5	+	105790386	105790497	111	-31.6	Extragenic		N/A
2432	chr5	-	121794949	121794968	GAATGGTCCACGGCACGCAC	57	328	61	128	chr5	+	121794953	121795046	93	-32.6	Intron	+	Antisense
2442	chr5	+	133420091	133420114	AGGAGTCTCAGAGGGCCAGACACT	20	23	63	130	chr5	+	133420024	133420108	84	-33.8	Extragenic		N/A
2452	chr5	-	141233611	141233633	ACGGCCAAGCGCGAGATCTACCT	127	126	23	20	chr5	+	141233548	141233657	109	-55.6	Exon Other	-	Sense
2463	chr5	-	154153759	154153778	CCCTTTCATCTGAGGGCTAA	135	49	2	3	chr5	+	154153713	154153787	74	-31.7	Intron	+	Antisense
2468	chr5	-	170738617	170738636	GGCGATCCGTGGCGACGGTG	90	101	88	127	chr5	-	170738625	170738720	95	-56.7	Exon Other	+	Antisense
2469	chr5	-	172064543	172064562	GCGCCAAGGCGGCAGGACA	264	168	16	34	chr5	+	172064543	172064631	88	-32.3	Extragenic		N/A
2473-1	chr5	-	175457543	175457562	GTTCCGCCTGCTCCACCTCC	23	65	75	165	chr5	+	175457467	175457574	107	-37.7	Extragenic		N/A
2477	chr5	-	176956898	176956918	CCAAGGGGTCCCACCGCTGCC	74	51	227	305	chr5	+	176956894	176956998	104	-38.8	Intron	-	Sense
2473-2	chr5	+	177240227	177240246	GTTCCGCCTGCTCCACCTCC	23	65	75	165	chr5	-	177240214	177240321	107	-37.7	Extragenic		N/A
2482	chr5	-	178409859	178409878	TTTCCTGCCTGTCAGGCTGG	116	326	23	7	chr5	-	178409852	178409936	84	-30.3	Intron	-	Sense
2492	chr6	+	1287438	1287456	ATGCCTCAGGAATCCTCCT	53	132	7	4	chr6	-	1287347	1287457	110	-40.4	Extragenic		N/A
2501	chr6	+	5232844	5232864	TTTGGATGTTGTCCTTAAGTA	26	31	290	50	chr6	+	5232792	5232881	89	-32.2	Intron	+	Sense
2504	chr6	+	10404374	10404395	AAAAGGTGGCTGTACGGCGCCC	172	190	936	912	chr6	+	10404313	10404404	91	-31.6	Intron	-	Antisense
2505	chr6	+	11167456	11167476	GGCCCTGCCGACAGGAAGGCT	34	24	80	136	chr6	+	11167388	11167493	105	-32.4	Extragenic		N/A
2506	chr6	+	12842629	12842648	AGGAGGCTGTGTAATTTTGC	12	11	116	111	chr6	+	12842540	12842643	103	-32.2	Intron	+	Sense
2508	chr6	+	16762253	16762271	CCCCAAGGGCTGTCAGGCT	62	340	12	8	chr6	+	16762254	16762345	91	-41.5	Extragenic		N/A
2509	chr6	-	17032207	17032229	CCTTGCCTCAGAGGCTATTTGGA	1007	853	279	113	chr6	-	17032196	17032283	87	-35	Extragenic		N/A
2512	chr6	+	21116210	21116228	TCCTCATCAATGCCAACCT	28	9	211	220	chr6	-	21116124	21116231	107	-36	Intron	+	Sense
2515	chr6	+	21615502	21615522	TTTCCTTTTTCAGAGGCTGGA	88	172	0	0	chr6	+	21615409	21615518	109	-43.6	Extragenic		N/A
2521	chr6	+	28697801	28697822	GCCTTCCGCCTCTCTCCTCGGG	1060	615	103	52	chr6	-	28697747	28697841	94	-38.5	Extragenic		N/A
2523	chr6	-	29796945	29796966	GCCAAGGGACTCAGAGGAGCTG	166	159	15	31	chr6	-	29796939	29797036	97	-40.6	Intron	+	Antisense
2538	chr6	-	32975294	32975312	TCCTCATCTGCATCGTGGA	27	13	123	219	chr6	+	32975215	32975307	92	-32.9	Exon Other	-	Sense
2543	chr6	+	33542101	33542121	AATTAAGGCCGCAGAGGCTGC	74	101	15	5	chr6	-	33542051	33542118	67	-34.6	Intron	-	Antisense
2550	chr6	-	37401114	37401133	TGCCGGGGAGCGGAGGGGGG	93	146	30	45	chr6	+	37401100	37401199	99	-54.1	Exon Other	+	Antisense
2551	chr6	+	37567783	37567801	AGCCATTGAAAGCCCTTGG	86	44	276	653	chr6	+	37567758	37567868	110	-37.1	Extragenic		N/A
2554	chr6	-	41605967	41605986	TCCGCGCTCTCGGAGCGGGG	294	147	11	3	chr6	+	41605904	41606012	108	-54.1	Exon Other	+	Antisense
2556	chr6	-	41909275	41909293	TCCGCCTGGAGGAGCGCTA	265	193	7	6	chr6	-	41909264	41909366	102	-51	Exon Other	-	Sense
2569	chr6	-	57480208	57480227	GGAGCTCAGAGGGATAAGGG	56	193	14	14	chr6	-	57480142	57480254	112	-32.3	Intron	+	Antisense
2571	chr6	-	72029976	72029996	CACATGGACTTGCATGATTCA	57	60	134	112	chr6	+	72029982	72030079	97	-32.1	Extragenic		N/A
2576	chr6	+	98487519	98487539	CCTTCTGCCACTGCTGACCTT	114	53	4	6	chr6	+	98487455	98487535	80	-35.6	Extragenic		N/A
2579	chr6	-	105729970	105729990	TTACTGATGAGAATCCCCACC	639	928	35	39	chr6	+	105729964	105730059	95	-32.33	Intron	-	Sense
2583	chr6	-	108944416	108944434	AGACGACTACGGCTCCTGC	49	20	188	181	chr6	+	108944351	108944445	94	-37	Intron	+	Antisense
2591	chr6	+	118486156	118486174	ATTTTCTGCCTGAGAAAGC	251	153	153	135	chr6	-	118486159	118486248	89	-30.8	Intron	+	Sense
2592	chr6	+	131086671	131086691	CCTCCTCAGTGCATTCCAAGG	130	92	99	123	chr6	-	131086674	131086786	112	-32.1	Extragenic		N/A
2597	chr6	+	133174310	133174330	CCCTTCTATCACTGAATTAGA	216	190	621	249	chr6	+	133174298	133174396	98	-33.7	Extragenic		N/A
2600	chr6	-	137551299	137551319	ATAGAGATGCTGCTTGGTCAG	66	47	199	331	chr6	+	137551295	137551400	105	-35.6	Extragenic		N/A
2601	chr6	+	138083100	138083118	TTGCATCACCTTAGCGTGG	184	133	9	2	chr6	-	138083082	138083189	107	-31.5	Extragenic		N/A
2608	chr6	-	148867141	148867159	GCGGCCATGCTGCCAGGGA	45	37	275	610	chr6	+	148867137	148867242	105	-38.1	Intron	+	Antisense
2614	chr6	+	157528868	157528887	CGGCCAAGGCTTTGCTAGCC	414	384	3	3	chr6	-	157528787	157528886	99	-45.9	Exon Other	+	Sense
2615	chr6	-	157723946	157723964	AAAGGAATAGTGACTTAGT	319	547	164	62	chr6	-	157723883	157723985	102	-31.5	Intron	-	Sense
2616	chr6	-	158085760	158085779	AAAGTAGTGCATTAGGGACA	28	24	85	112	chr6	+	158085664	158085770	106	-34.5	Intron	+	Antisense
2622	chr6	-	159338984	159339002	TTCCCCACTCAGAGGCTGG	105	93	1	0	chr6	+	159338989	159339061	72	-32.2	Extragenic		N/A
2624	chr6	-	166218117	166218135	GCCAAGGCCCCCGGGTTTC	43	319	5	4	chr6	+	166218119	166218228	109	-59.9	Intron	-	Sense
2635	chr6	+	169756825	169756843	ATGCTGACTCTTAGATTTT	57	120	55	21	chr6	+	169756756	169756859	103	-30.9	Extragenic		N/A
2646	chr7	-	2205073	2205091	GGGTTCATGCTGACGGCTC	180	151	16	5	chr7	+	2205062	2205151	89	-30.1	Intron	-	Sense
2647	chr7	-	2679761	2679779	CTCGCTCCTCGGCTGGACA	108	91	15	2	chr7	-	2679698	2679794	96	-37	Intron	+	Antisense
2653	chr7	-	5267559	5267581	CACACGGCCAAGGCTGCACTCGT	692	775	107	17	chr7	+	5267560	5267646	86	-37.3	Intron	+	Antisense
2666	chr7	+	27182834	27182856	GTCGGCCGAGGCGCCGCTGGAGT	174	165	15	11	chr7	+	27182763	27182854	91	-50.3	Exon Other	-	Antisense
2672	chr7	+	29130906	29130928	GTGATGCTCTGTCTTAGAGGGGG	26	225	7	3	chr7	+	29130831	29130929	98	-37.54	Intron	-	Antisense
2702	chr7	-	53339895	53339914	CTCACGTGCCAGGGATCCCA	8	9	68	228	chr7	+	53339876	53339987	111	-40.9	Extragenic		N/A
2708	chr7	-	57269511	57269529	CACCCTGGACATGCCGGTT	352	200	243	227	chr7	-	57269420	57269525	105	-36.5	Extragenic		N/A
2720	chr7	+	73436363	73436381	GGTTCCGGGCATGGGTGGA	132	147	109	121	chr7	-	73436276	73436385	109	-62.5	Intron	-	Antisense
2721	chr7	-	73454306	73454327	TGGAAAGGAGGAGAAAGCGGGG	38	111	5	2	chr7	+	73454290	73454394	104	-39.4	Intron	-	Sense
2726	chr7	-	75615978	75615996	GGCTGTGCTGCCAGGGGCC	29	31	166	144	chr7	+	75615968	75616051	83	-42.7	Exon Other	+	Antisense
2729	chr7	-	76636133	76636151	GGCCCTGCTCTGAGAATCC	122	57	22	10	chr7	-	76636139	76636237	98	-55.4	Intron	+	Antisense
2745	chr7	+	106018781	106018799	CCTCATCCAGAGGCTGGGT	157	38	8	3	chr7	+	106018777	106018858	81	-41.6	Extragenic		N/A
2751	chr7	+	117536249	117536269	GATGCATCAGATCAGTGGTGG	128	53	2	0	chr7	+	117536232	117536326	94	-33.8	Extragenic		N/A
2755	chr7	-	123504075	123504094	CCTCATCACTGCCCCTTCCT	48	47	124	112	chr7	+	123504021	123504109	88	-36	Intron	+	Antisense
2756	chr7	-	127184323	127184342	CCCCTTGCATCACTCAAATC	8	9	93	101	chr7	+	127184305	127184401	96	-39.14	Extragenic		N/A
2765	chr7	-	133894128	133894150	CAGAGCTTGCTGAGAATCGCCAG	237	210	42	9	chr7	-	133894125	133894219	94	-40.1	Intron	+	Antisense
2771	chr7	-	139892320	139892339	CCCCCCTCAGACACGTTACC	287	172	56	64	chr7	+	139892325	139892415	90	-32.5	Extragenic		N/A
2772	chr7	-	139929597	139929615	CGAGCTGTGAGCTCCTGGA	49	32	86	171	chr7	+	139929594	139929667	73	-34.17	Extragenic		N/A
2787	chr7	+	152771294	152771314	GGGGAGCTCACGCCGTGGAGA	8	2	123	123	chr7	+	152771228	152771315	87	-43.7	Extragenic		N/A
2790	chr7	-	157360514	157360534	GAAGAGTCTGCATTAGCCTTG	79	34	286	196	chr7	-	157360436	157360545	109	-37.3	Intron	-	Sense	hsa-mir-153-2
2797	chr8	+	1304694	1304713	GGAAGCGCTCCTCCCTCGGG	215	180	28	3	chr8	+	1304621	1304707	86	-36.4	Extragenic		N/A
2804	chr8	+	6427368	6427387	CTGCCAGAGACTCTTAGCGG	248	294	6	8	chr8	+	6427355	6427436	81	-31	Intron	+	Sense
2816	chr8	-	11413335	11413354	CTCATCACGTTTAACCTCC	59	73	179	259	chr8	+	11413335	11413426	91	-32.2	Intron	+	Antisense
2822	chr8	-	18949463	18949484	GGAAGTACAGTCAGGCTGGACA	93	280	3	0	chr8	+	18949377	18949489	112	-32.03	Extragenic		N/A
2825	chr8	+	19591639	19591659	CTTCCATCTCAGAATCAAGGT	218	163	1	0	chr8	+	19591564	19591650	86	-33.3	Intron	-	Antisense
2826	chr8	-	20028871	20028889	GGTGACAGCCCAGGTCAGG	19	24	11	101	chr8	+	20028859	20028961	102	-41.5	Intron	-	Sense
2832	chr8	+	21769968	21769986	GGCCAAGGCGCAGTCCGAC	186	160	96	85	chr8	+	21769957	21770061	104	-56.4	Exon Other	-	Antisense
2836	chr8	-	23404455	23404476	GGGGGGAGCAGTGCTAATTCCA	45	36	275	164	chr8	+	23404436	23404528	92	-38.8	Intron	+	Antisense
2838	chr8	+	23625560	23625580	CCAAAAACATCTGACTTAGTT	23	105	2	0	chr8	+	23625471	23625582	111	-32.1	Extragenic		N/A
2846	chr8	+	38011681	38011699	GGCCAAGGCTCTCTCCCTC	300	320	23	7	chr8	+	38011588	38011698	110	-49.7	Extragenic		N/A
2848	chr8	-	38243972	38243994	CGGTTCCGCCTCTTTCCTCGCCC	312	170	23	4	chr8	+	38243909	38243991	82	-30.9	Extragenic		N/A
2856	chr8	+	48278866	48278885	GGACACTGTTAGCCTTAAGT	157	163	285	317	chr8	+	48278796	48278896	100	-42.9	Intron	+	Sense
2857	chr8	+	49417340	49417358	TCATCACGTGGCCCCTTTT	48	74	609	972	chr8	-	49417247	49417353	106	-38.6	Extragenic		N/A
2858	chr8	+	49588203	49588222	ACGAGCATCAGTCTCCAGAG	54	184	9	3	chr8	-	49588208	49588307	99	-41.3	Extragenic		N/A
2871	chr8	+	80957563	80957581	TGGAATAGTCACATTGCCA	12199	8932	2895	3166	chr8	-	80957546	80957654	108	-38.2	Intron	-	Antisense
2875	chr8	+	86201836	86201855	TCCTCATCTGTCTTAGCCTT	362	100	17	4	chr8	+	86201778	86201886	108	-38.5	Intron	+	Sense
2877	chr8	-	92782590	92782610	CTTCTGCTGTCATGCTGGATA	162	90	137	130	chr8	-	92782591	92782702	111	-35.8	Extragenic		N/A
2878	chr8	+	94914374	94914392	CCAGATCAGGTTAGGATTG	19	26	190	396	chr8	-	94914309	94914406	97	-31	Extragenic		N/A
2887	chr8	+	117588875	117588893	GGTATAGGAGAATCAAACA	20	101	1	0	chr8	-	117588866	117588952	86	-31.8	Extragenic		N/A
2891	chr8	-	124603414	124603433	ATGTCTTGCTGCTTTTGCTC	12	12	139	190	chr8	+	124603336	124603446	110	-35.4	Extragenic		N/A
2899	chr8	+	133919035	133919057	AATTGCTGTGCCGCCAGGGCTCC	86	72	116	112	chr8	+	133919032	133919139	107	-39.5	Exon Other	+	Sense
2907	chr8	+	138062391	138062410	ATGTCCCACCGCTGCTACCA	81	116	144	211	chr8	-	138062326	138062431	105	-36.1	Extragenic		N/A
2924	chr8	+	144600141	144600162	ACGGCCAAGCCCCGAGGCCCTG	33	159	1	20	chr8	-	144600133	144600237	104	-50.7	Intron	-	Antisense
2925	chr8	+	144663792	144663812	CCAGGCTCAGAGGCTGGGTGG	72	141	4	0	chr8	-	144663783	144663877	94	-34.5	Intron	-	Antisense
2927	chr8	-	145004639	145004657	GGCCAAGCGGGCCAAGGCC	154	117	15	20	chr8	+	145004601	145004667	66	-31.6	Exon Other	-	Sense
2929	chr8	+	145047844	145047862	GCCGGTTCCGCGGGCTCCG	534	295	259	368	chr8	-	145047796	145047858	62	-34.2	Intron	-	Antisense
2939	chr9	-	15552594	15552612	AGCAACGGTGGGCTGGTCC	3	6	36	285	chr9	-	15552538	15552619	81	-42.9	Extragenic		N/A
2945	chr9	-	20686443	20686463	CCATTAACCTTGCAATCTTGA	29	116	1	0	chr9	+	20686379	20686486	107	-32.8	Intron	+	Antisense
2951	chr9	-	36818312	36818331	GGCCAAGGCCAGAGAGCGTC	348	206	87	147	chr9	+	36818306	36818397	91	-37.6	Extragenic		N/A
2955	chr9	-	38395740	38395758	GGAAGCGCAGCATGCTGAC	171	277	2	0	chr9	-	38395730	38395809	79	-35.8	Exon Other	+	Antisense
2964	chr9	-	84202562	84202582	TTCCGCCTGCCCTGGAGTCTG	130	85	14	1	chr9	-	84202568	84202677	109	-44.3	Intron	-	Sense
2982	chr9	+	97827688	97827711	AGGAGCAGTGCCGGCCAAGGCGCC	5142	3262	4409	2416	chr9	+	97827632	97827728	96	-48	Intron	+	Sense
2994	chr9	-	100565922	100565942	ACGGCCAAGGCACTCGCAGCC	344	296	673	870	chr9	+	100565908	100565981	73	-40.1	Extragenic		N/A
2995	chr9	+	100932533	100932552	TCTCCCCTTCTGCTGTGCCC	63	70	133	142	chr9	+	100932523	100932594	71	-31.5	Intron	-	Antisense
3003	chr9	-	112146442	112146462	CCTACAGTGGCTAAGTACTGC	25	19	73	127	chr9	+	112146438	112146543	105	-39.2	Intron	-	Sense
3013	chr9	-	123575017	123575038	CCTGCCATGGCCCAACTAGGAG	100	168	38	2	chr9	+	123574991	123575100	109	-45.6	Extragenic		N/A
3018	chr9	+	125215647	125215665	ACAAGCATGAGTCTCCAGA	54	110	3	1	chr9	-	125215583	125215693	110	-35.4	Extragenic		N/A
3034	chr9	-	131467871	131467889	GGCCAAGGCCAGGGGCCAG	44	125	39	149	chr9	-	131467873	131467977	104	-45.4	Intron	+	Antisense
3036	chr9	+	131679981	131680003	CAAGCCGGTTCCCGTCCCTGGCG	101	152	186	322	chr9	+	131679963	131680059	96	-39.5	Exon Other	+	Sense
3039	chr9	+	132686150	132686168	GATTTTGGGTTTGGAGGTC	114	81	41	43	chr9	+	132686080	132686191	111	-32.4	Exon Other	-	Antisense
3040	chr9	+	132805061	132805079	GGCCAAGGCGGACGAGGGG	87	80	81	205	chr9	-	132805054	132805112	58	-34.9	Intron	-	Antisense
3057	chr9	+	137249248	137249266	CCCCTCTGCTGTAGCCGCG	157	109	34	9	chr9	+	137249241	137249322	81	-43.5	Intron	+	Sense
3058	chr9	+	137294700	137294719	GTTCCTAGTAGCTGAAGGCT	134	136	2	1	chr9	+	137294626	137294732	106	-35.8	Exon Other	+	Sense
3068	chr9	-	138375308	138375326	CCCCTTGGCTCAGAGGCTG	47	182	10	5	chr9	-	138375279	138375381	102	-35.5	Intron	+	Antisense
3071	chr9	-	138869270	138869289	TATGGAATATTCAGAGGCTC	1467	1659	181	74	chr9	-	138869245	138869343	98	-35.8	Extragenic		N/A
3075	chr9	-	139085331	139085352	GTACCCGGTTCCGCCCCGCGCG	156	203	57	120	chr9	-	139085339	139085437	98	-47.9	Extragenic		N/A
3085	chr9	+	139565970	139565992	GCTGGACACTGACCAGGACCCCC	907	774	1303	1974	chr9	+	139565908	139566011	103	-49.5	Intron	+	Sense	hsa-mir-126
3086	chr9	+	139618084	139618102	TCCGCGAGGAGCTGGGCAC	824	626	203	225	chr9	-	139618081	139618185	104	-50.7	Exon Other	+	Sense
3104	chrX	+	1711172	1711190	GGCCAAGGGCCTGAGAATG	1265	1659	91	68	chrX	+	1711165	1711239	74	-37.3	Intron	+	Sense
	chrY	+	1661172	1661190	GGCCAAGGGCCTGAGAATG	1265	1659	91	68	chrY	+	1661165	1661239	74	-37.3	Intron	+	Sense
3107	chrX	+	3264581	3264599	GGGAGCGGTGCGCCGGGAG	11	23	301	94	chrX	+	3264579	3264663	84	-43.1	Exon Other	-	Antisense
3128	chrX	+	29573992	29574011	GCCATGCTGAGAATTGCAGG	126	82	18	4	chrX	-	29573988	29574072	84	-30.5	Intron	+	Sense
3148	chrX	-	48746628	48746647	TTCCGCTGCTCTCTTAGTGG	1233	970	355	124	chrX	-	48746585	48746675	90	-38.6	Extragenic		N/A
3154	chrX	+	53115826	53115844	AGTCTGTACCCGGCCTTGG	16	3	72	101	chrX	+	53115795	53115907	112	-42.4	Intron	+	Sense
3166	chrX	-	70469280	70469299	GGAGTAGTGCATTAGAGGGC	92	25	157	143	chrX	-	70469287	70469390	103	-37.4	Intron	-	Sense
3167	chrX	-	70943261	70943279	AGCTCATCTGAGCTGAGTG	97	112	217	166	chrX	+	70943243	70943322	79	-31.2	Intron	-	Sense
	chrX	+	70977948	70977966	AGCTCATCTGAGCTGAGTG	97	112	217	166	chrX	-	70977904	70977983	79	-31.2	Extragenic		N/A
3169-1	chrX	-	72027586	72027606	GCCGGTTCCAGAGGGCCCTGG	139	253	5	10	chrX	-	72027595	72027698	103	-44.6	Extragenic		N/A
3169-2	chrX	+	72132891	72132911	GCCGGTTCCAGAGGGCCCTGG	139	253	5	10	chrX	+	72132877	72132971	94	-37.3	Extragenic		N/A
3172	chrX	+	74768714	74768733	TTTCCTCATGTGCTAATCAA	822	397	480	272	chrX	-	74768651	74768752	101	-33.3	Extragenic		N/A
3179	chrX	+	80514289	80514308	AATAGATCAGAGGCTATTCT	139	249	78	50	chrX	+	80514286	80514398	112	-31.5	Intron	+	Sense
3185	chrX	+	102948585	102948606	AAGGCGGGTTCCATAGAGTACC	33	53	129	128	chrX	-	102948518	102948624	106	-37.3	Extragenic		N/A
3192	chrX	-	117291213	117291231	GGGGAAGTACTGTCAGGCC	54	109	56	29	chrX	-	117291210	117291292	82	-31.9	Extragenic		N/A
3198	chrX	-	132362847	132362866	CCTTGCTCAGAGGCTAGAAG	50	100	2	3	chrX	+	132362826	132362929	103	-32.4	Extragenic		N/A
3219	chrX	-	152070797	152070816	GGCCAAGGCCAGGGACCACC	366	531	354	1001	chrX	+	152070794	152070873	79	-34.3	Extragenic		N/A
3223	chrX	+	153231825	153231843	GGGCCTCGGACATGCCGAG	66	24	131	97	chrX	-	153231826	153231909	83	-36.3	Intron	-	Antisense
3233	chrY	+	8607840	8607859	CATTAACCTTACTGCCTCCC	128	70	19	16	chrY	-	8607782	8607889	107	-37.2	Extragenic		N/A
